# Supplementary figures and images for: Facile synthesis of γ-alkylidenebutenolides
Source: Royal Society of Chemistry journal article supplement (doi:10.1039/b701051f), 2007-01-01

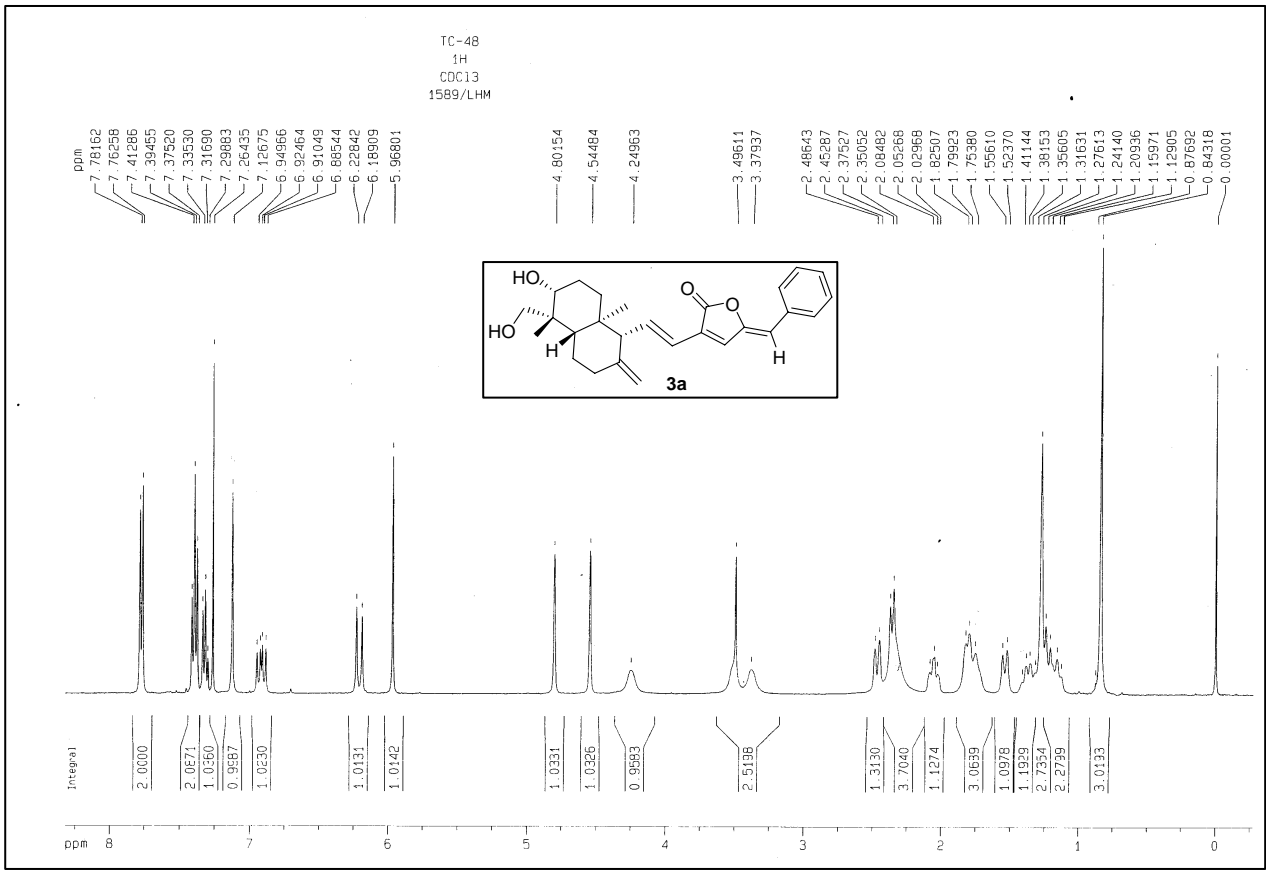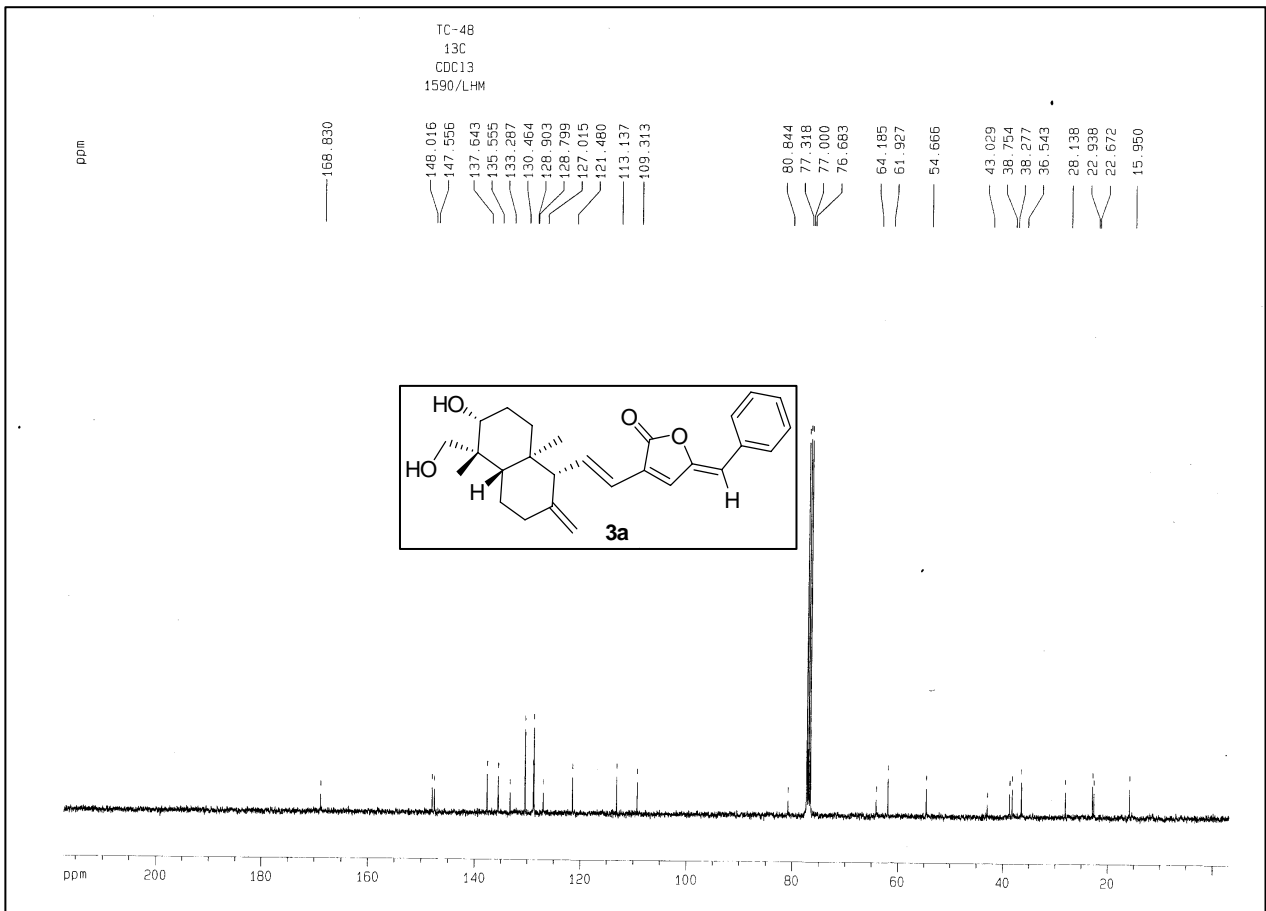

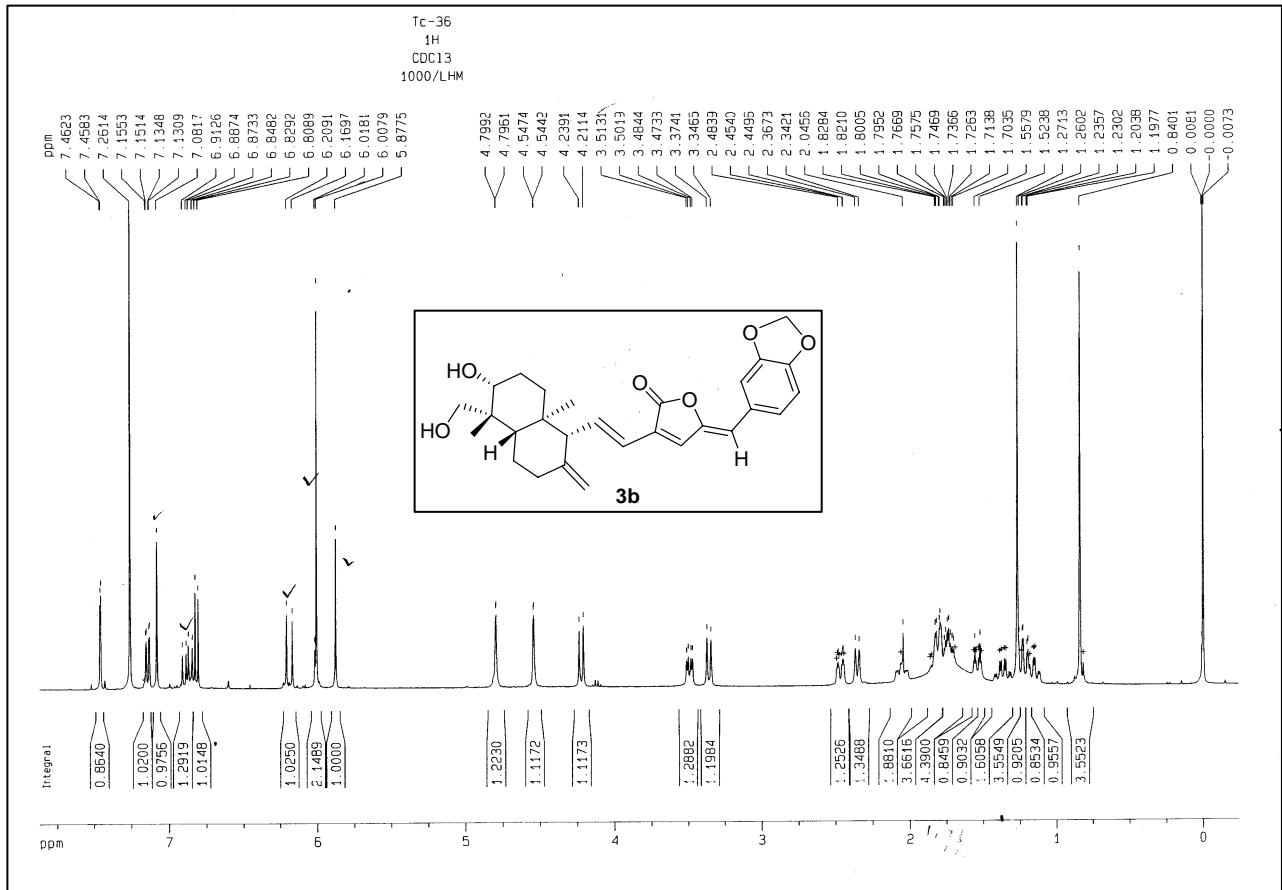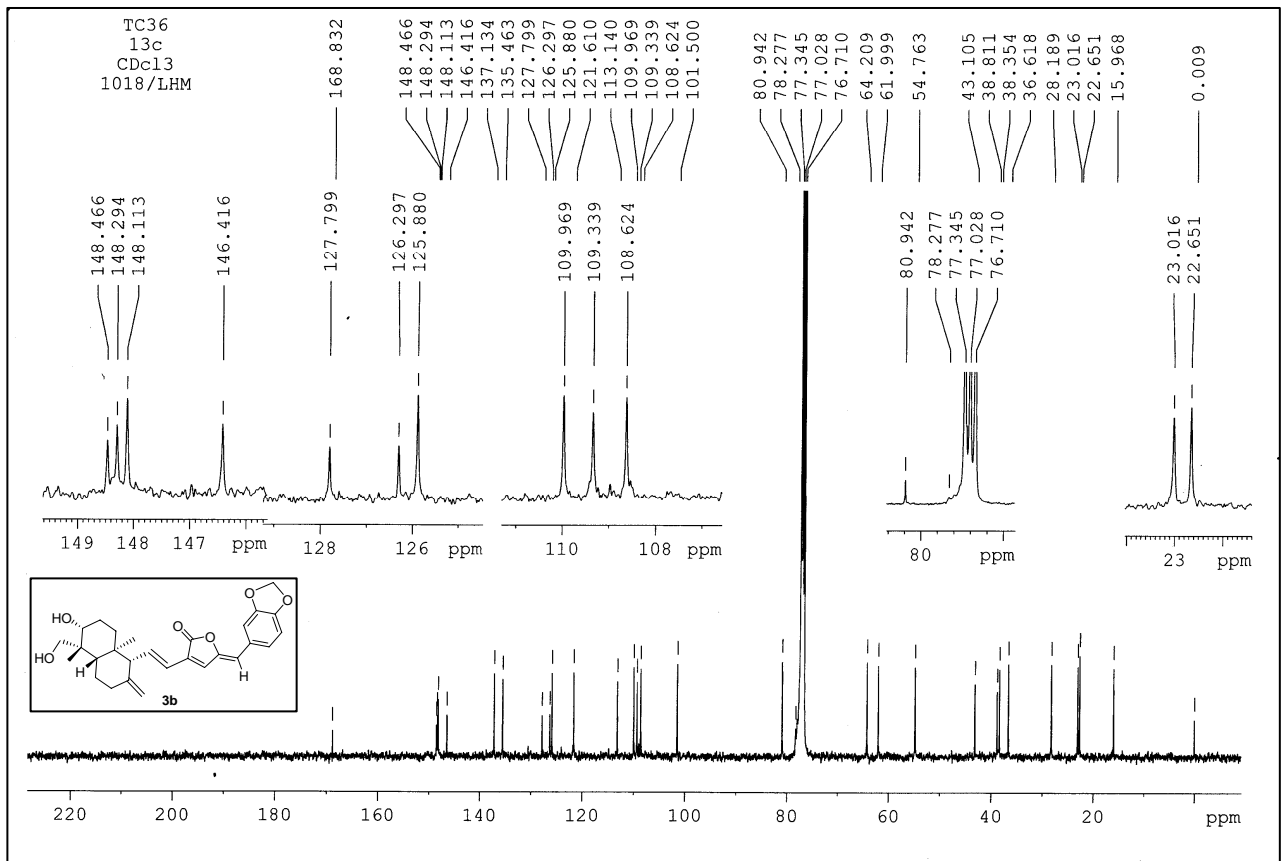



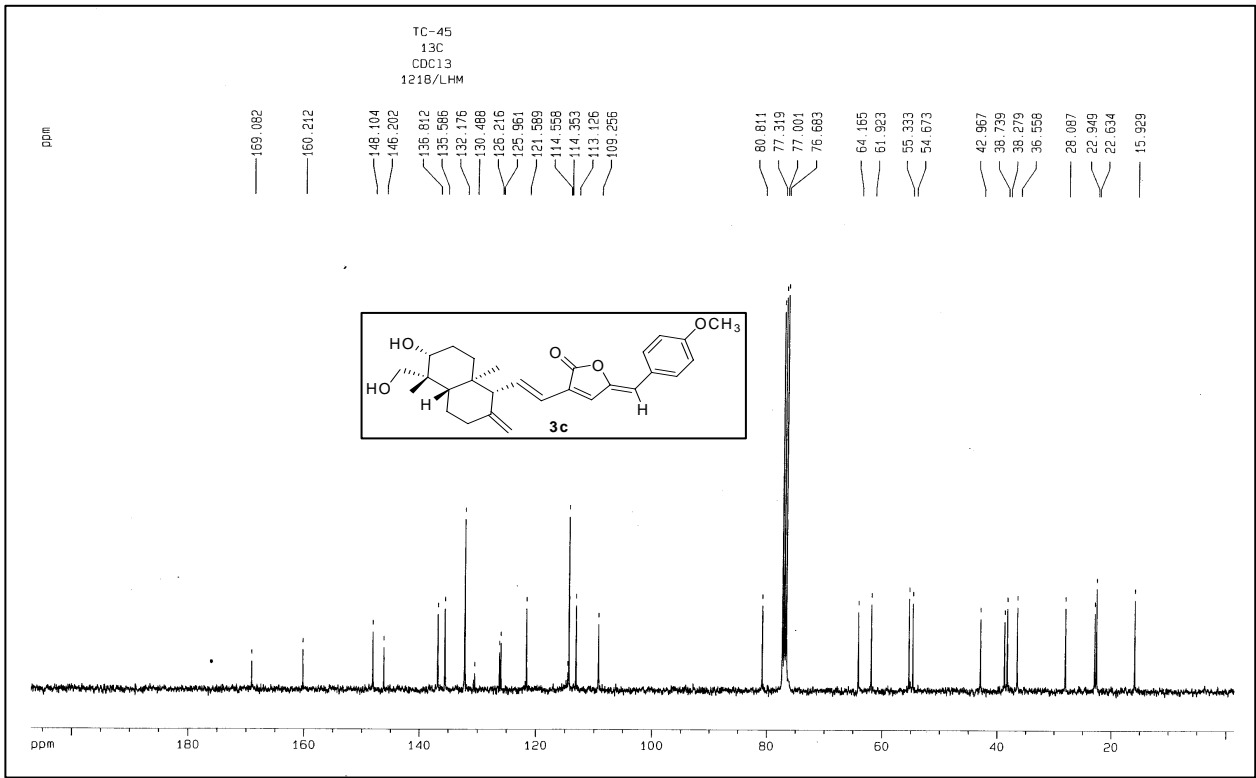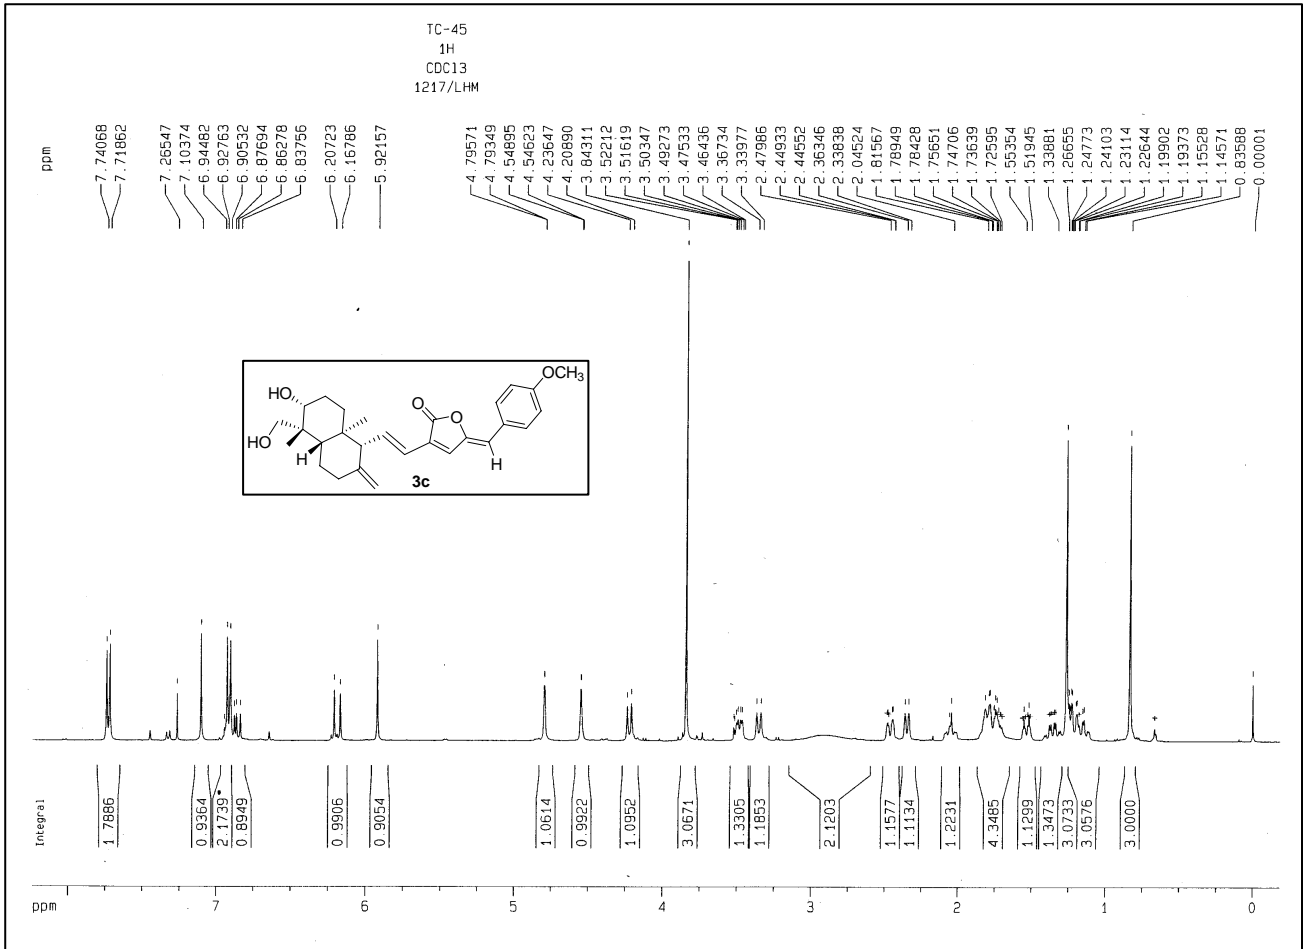

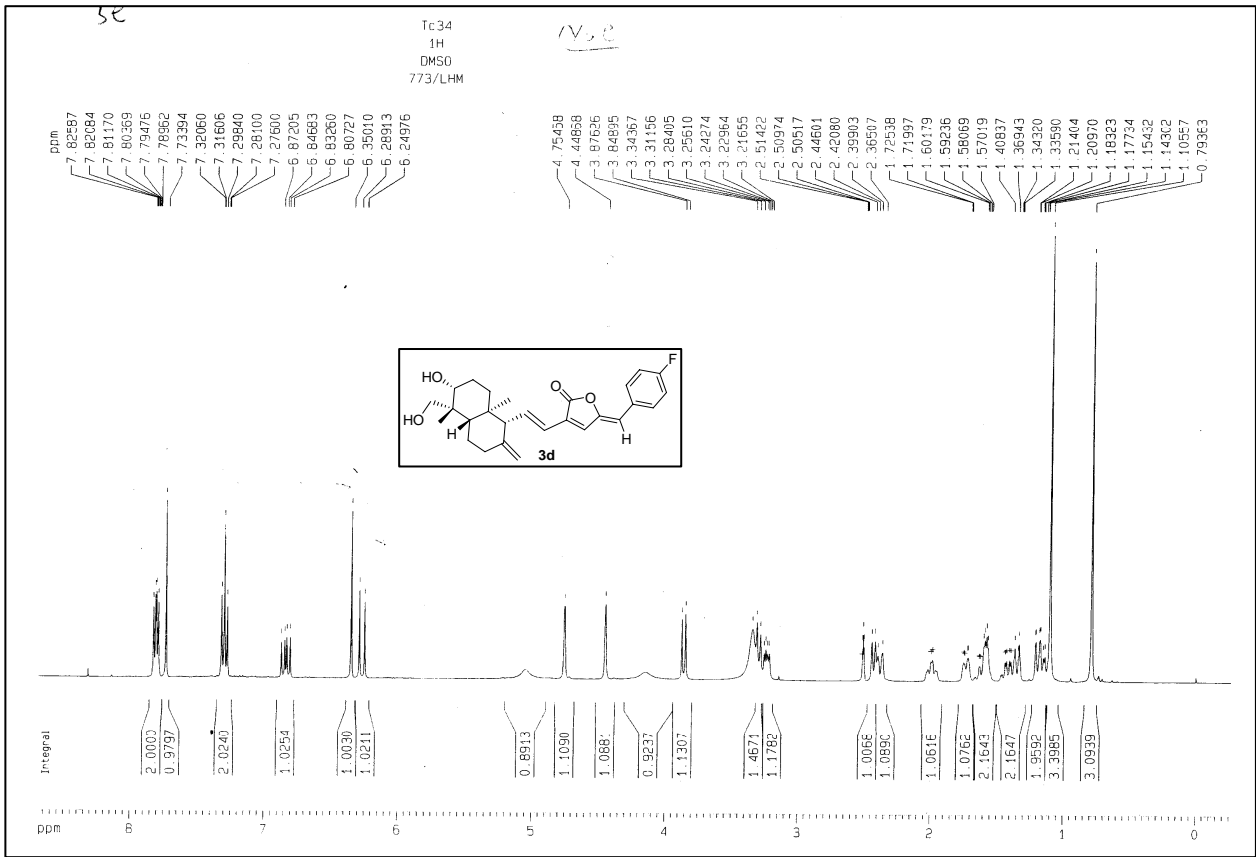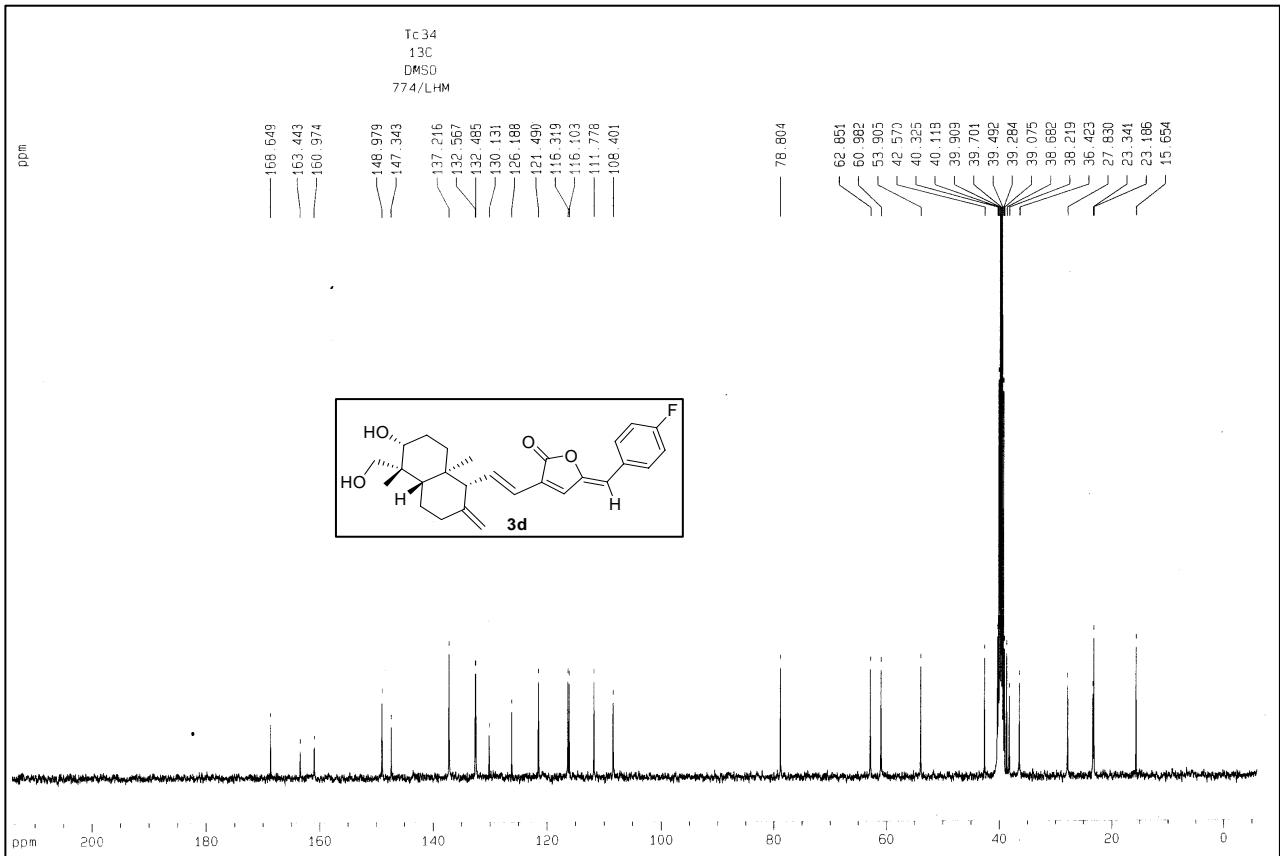

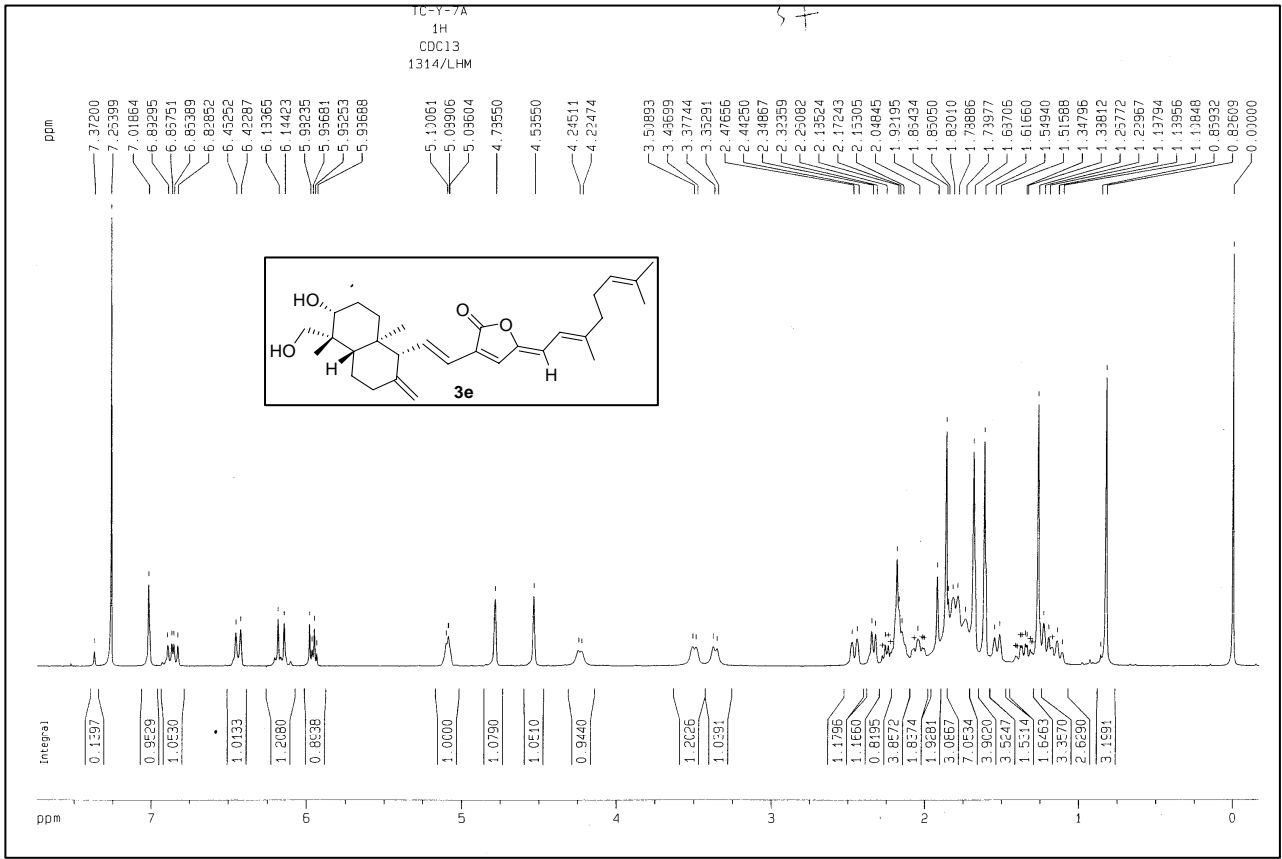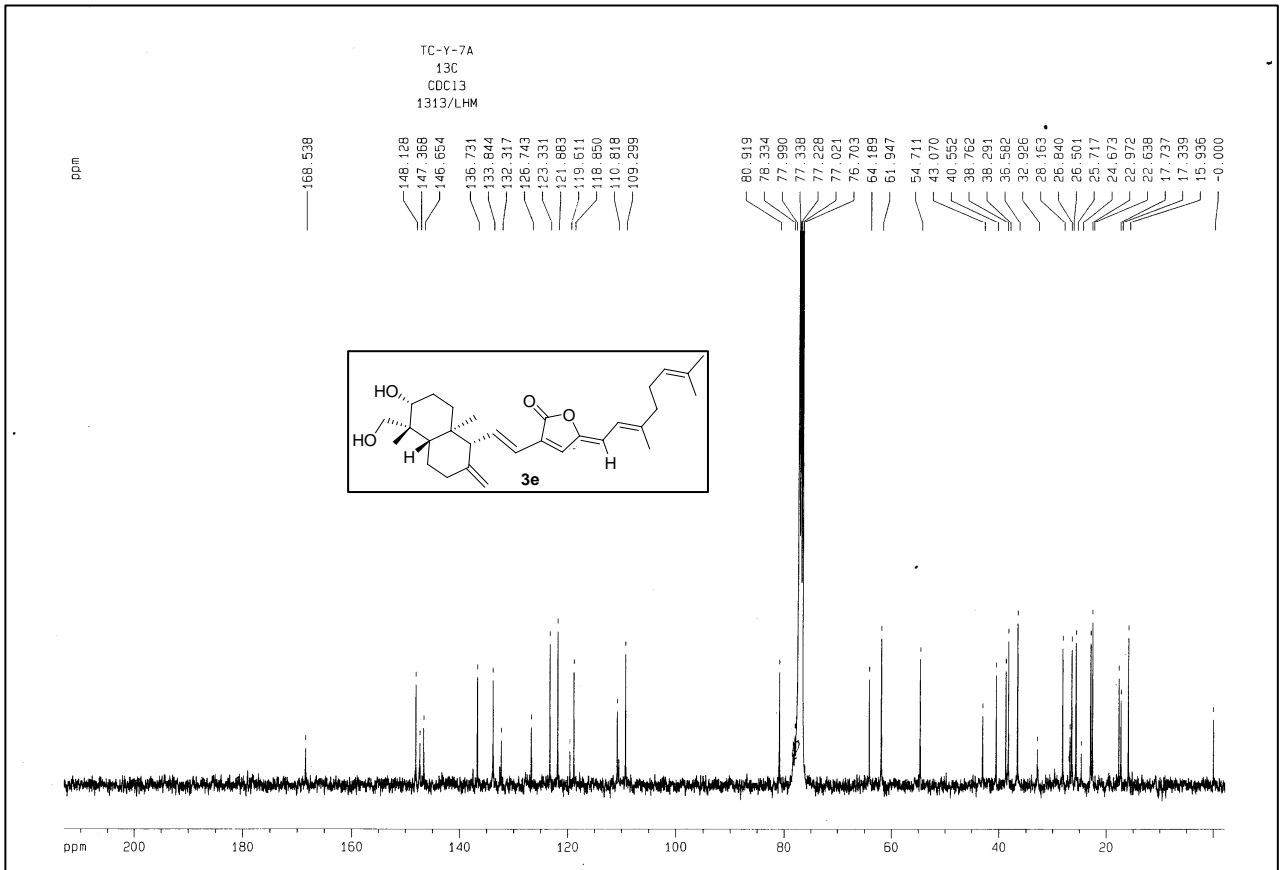

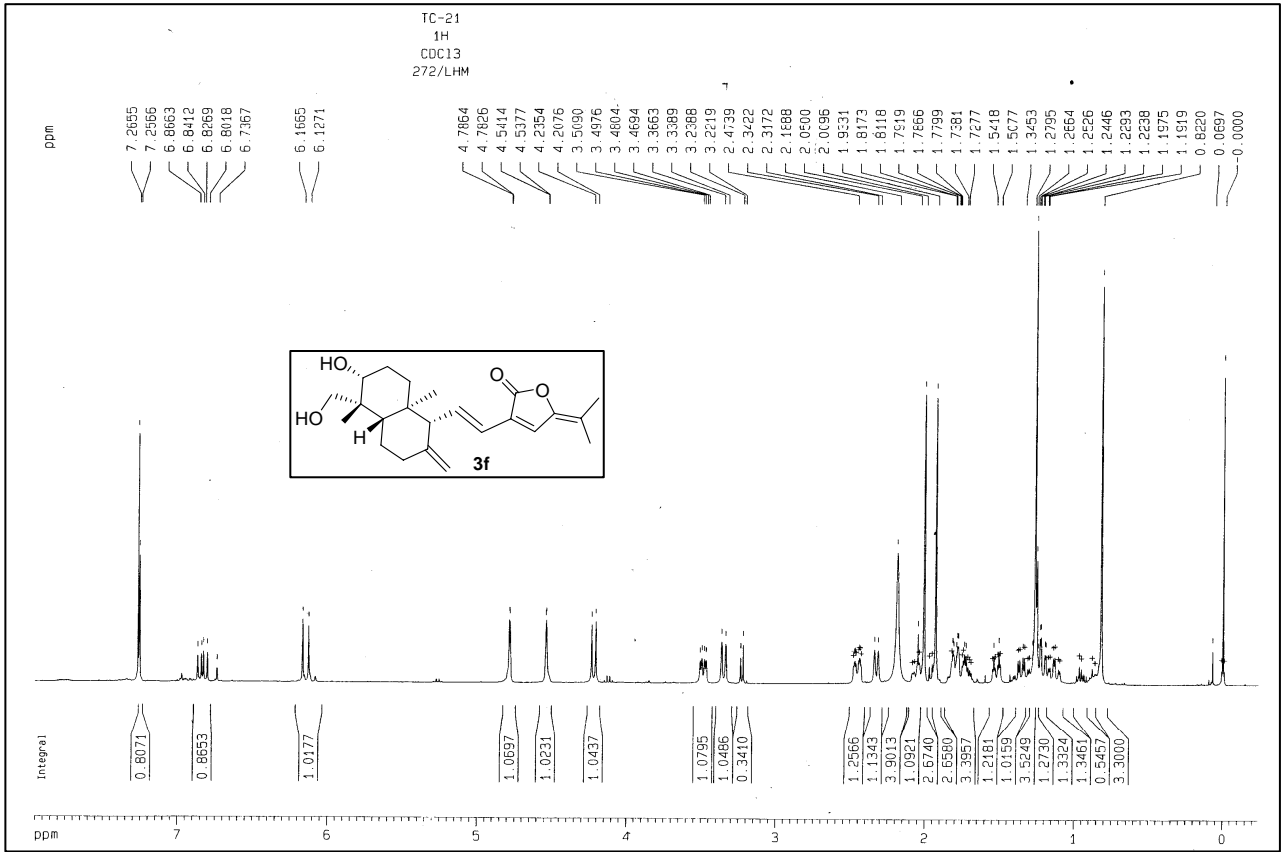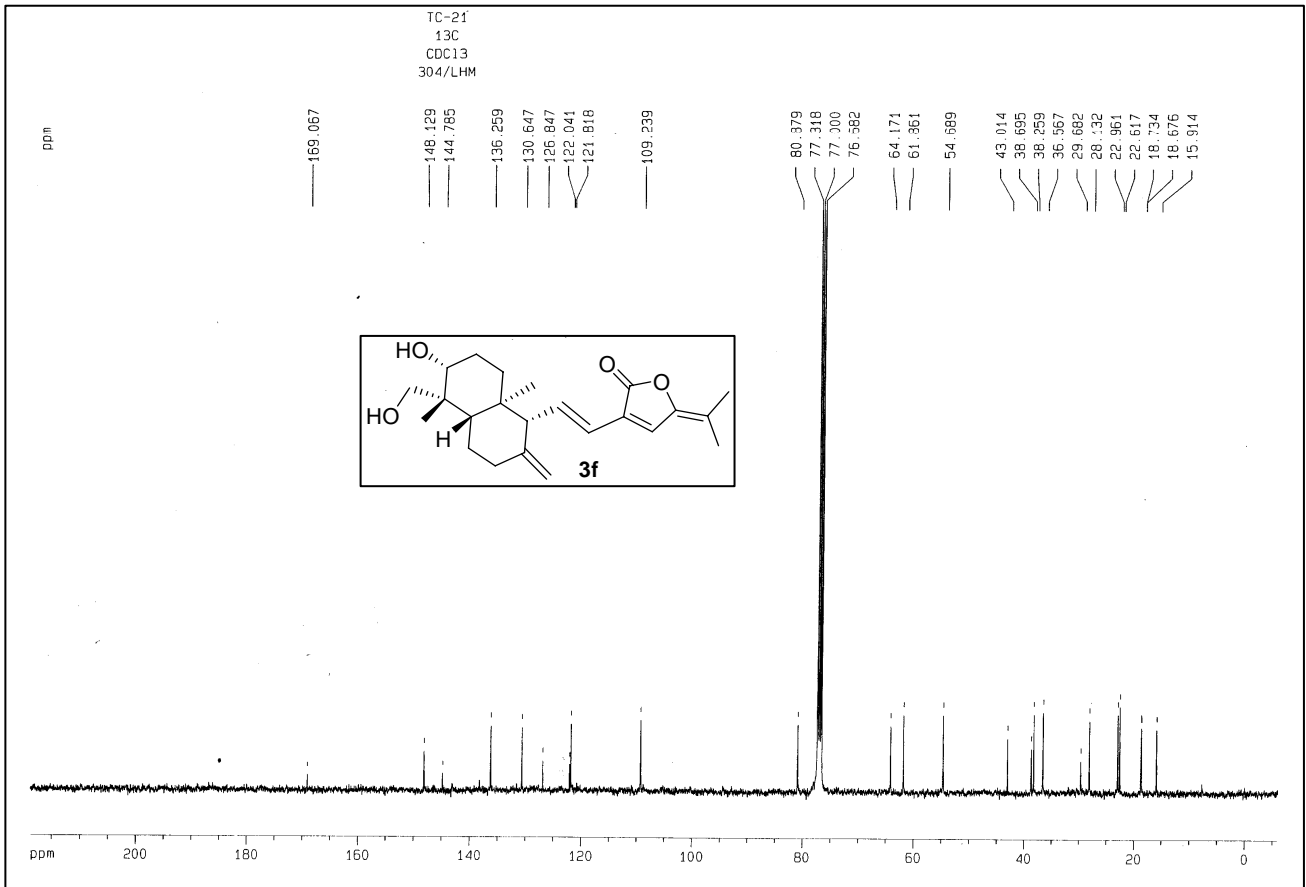

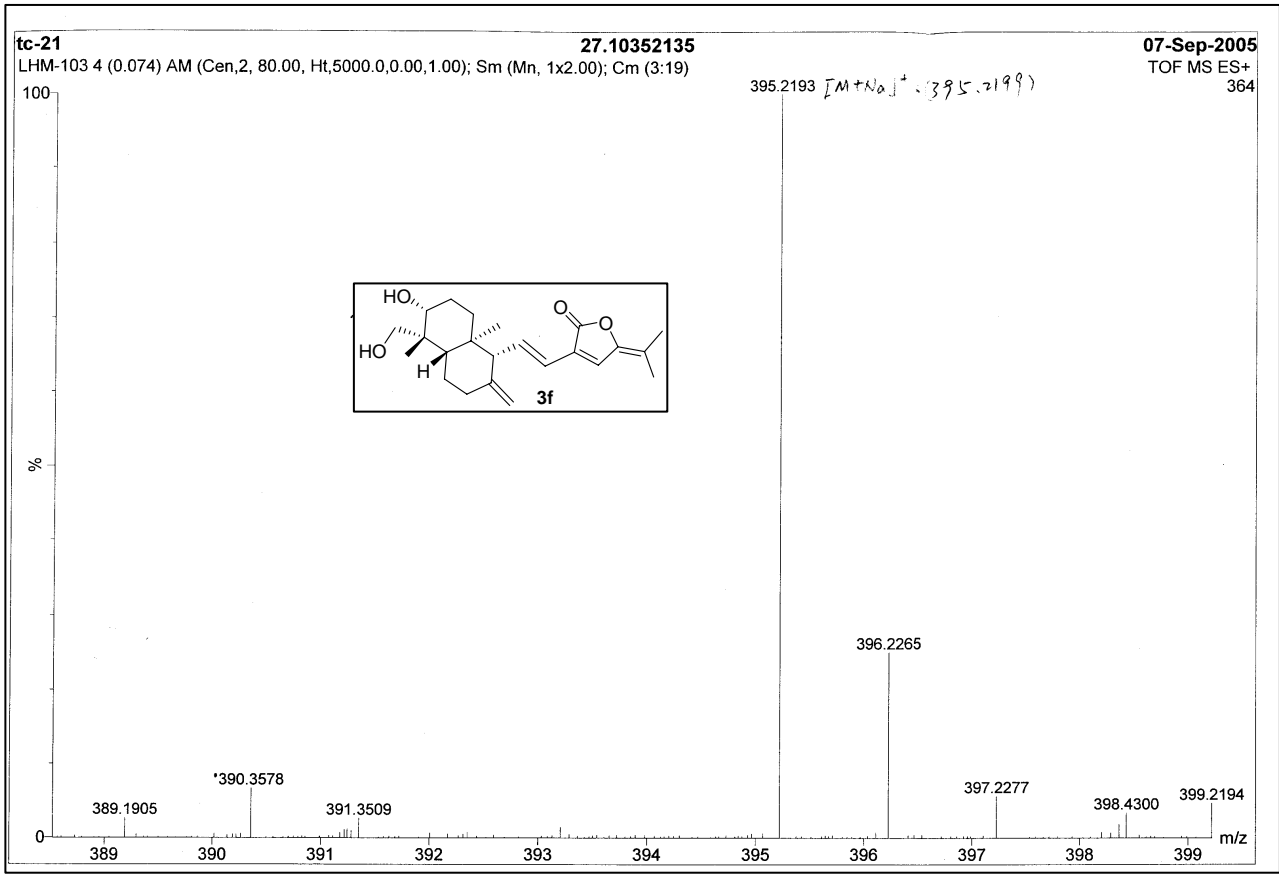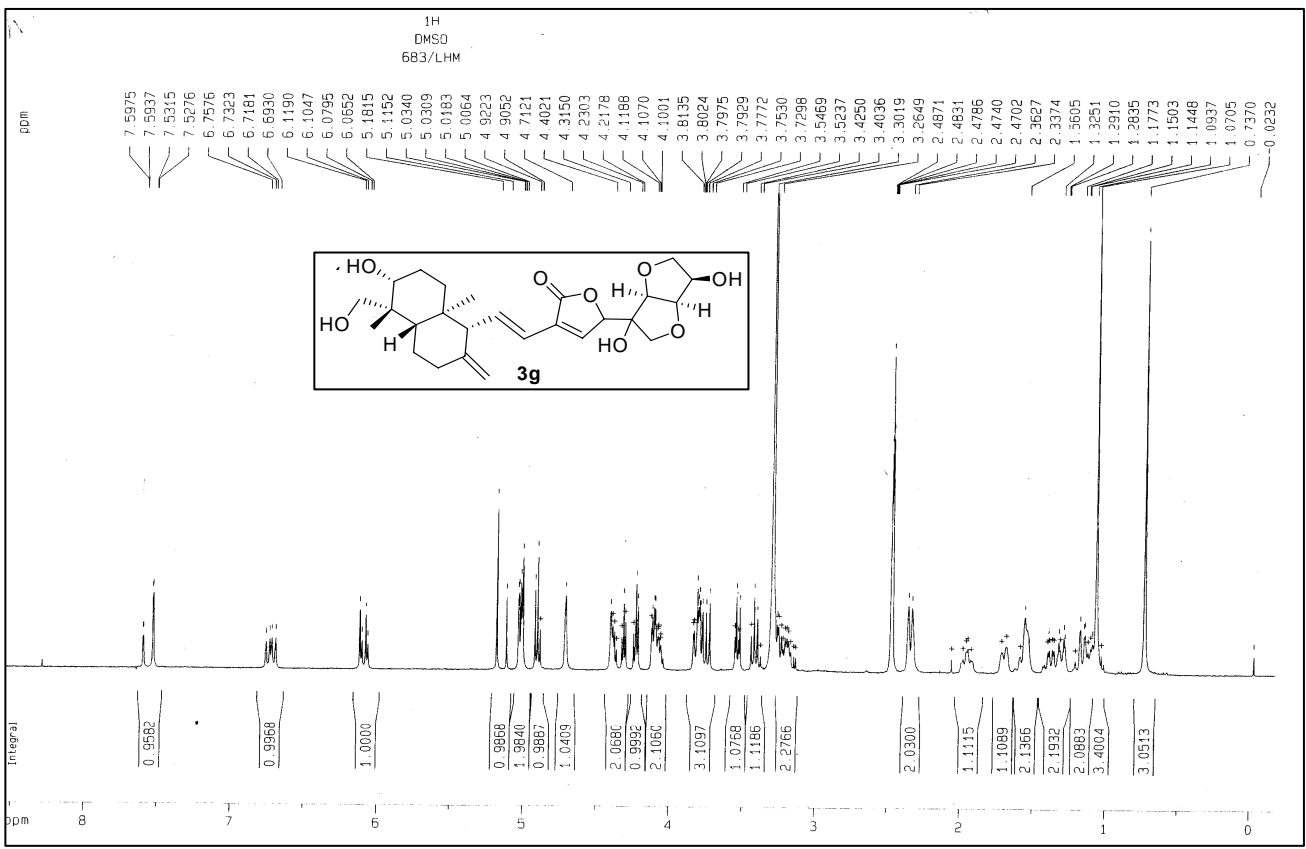



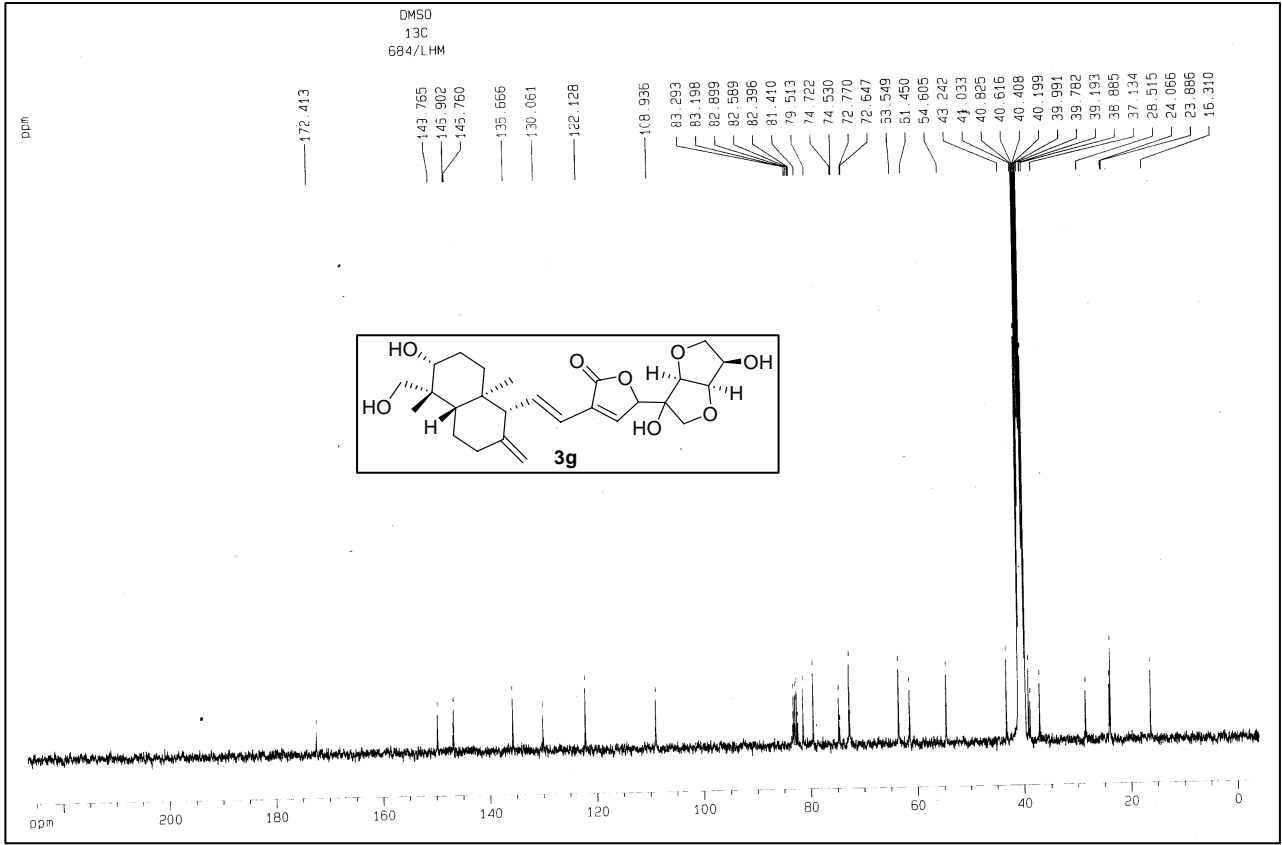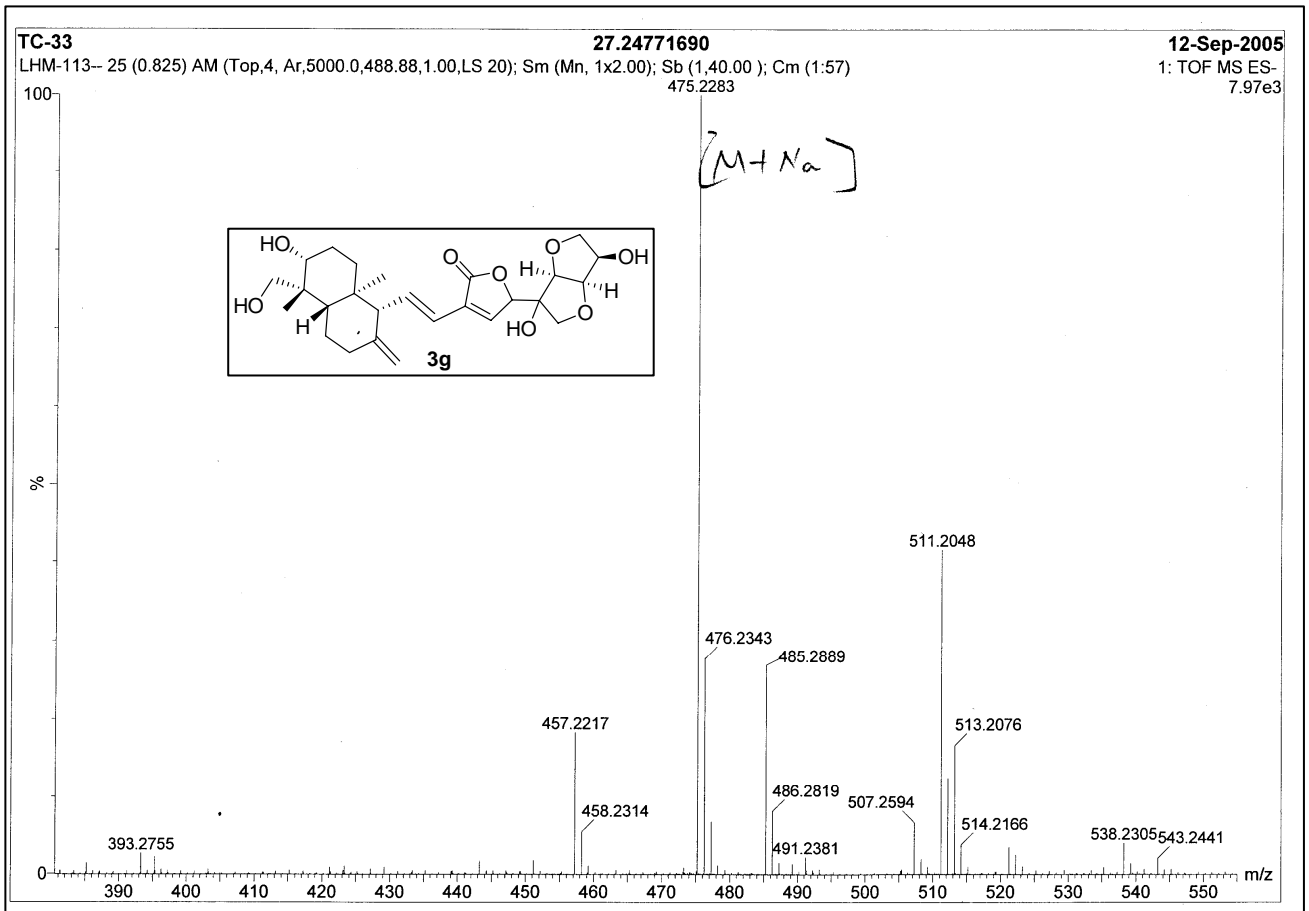

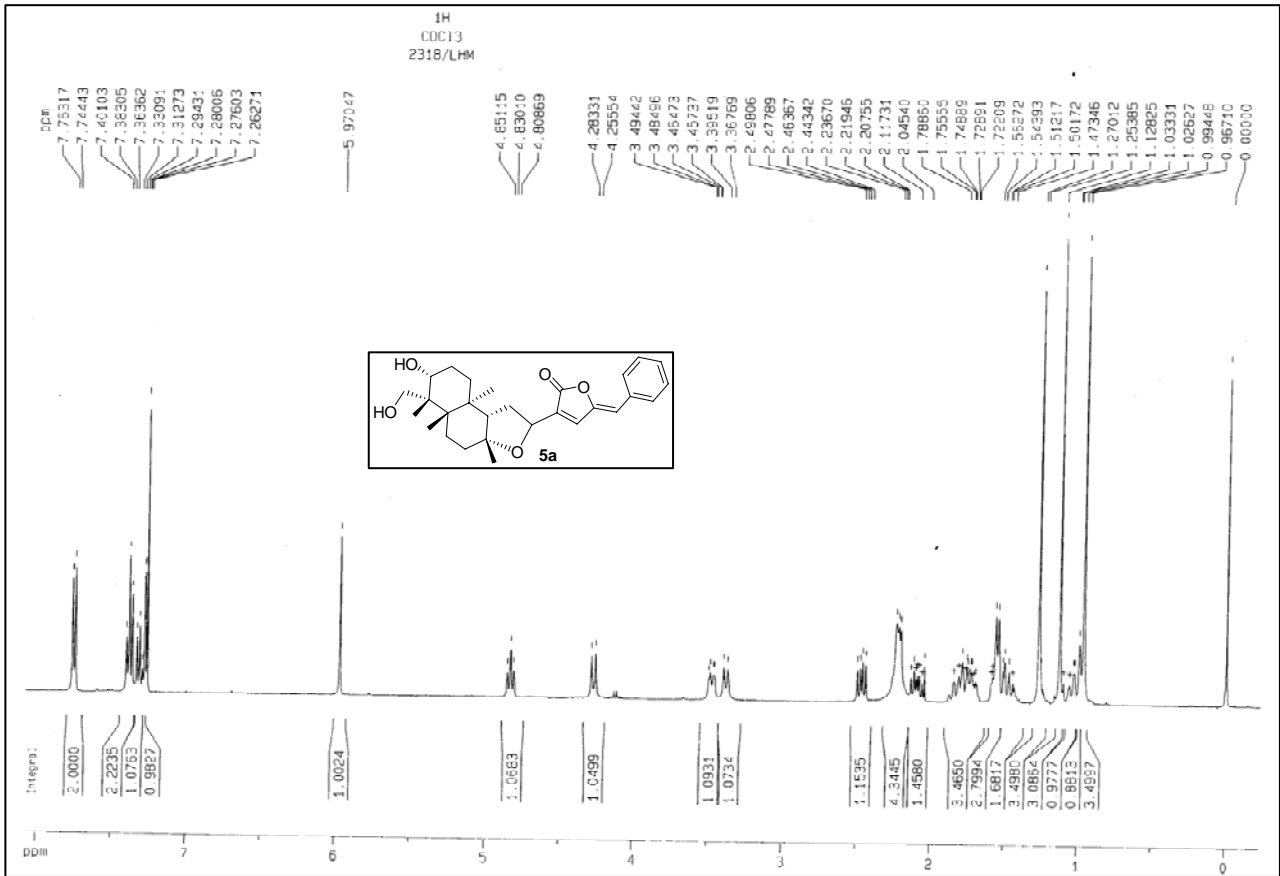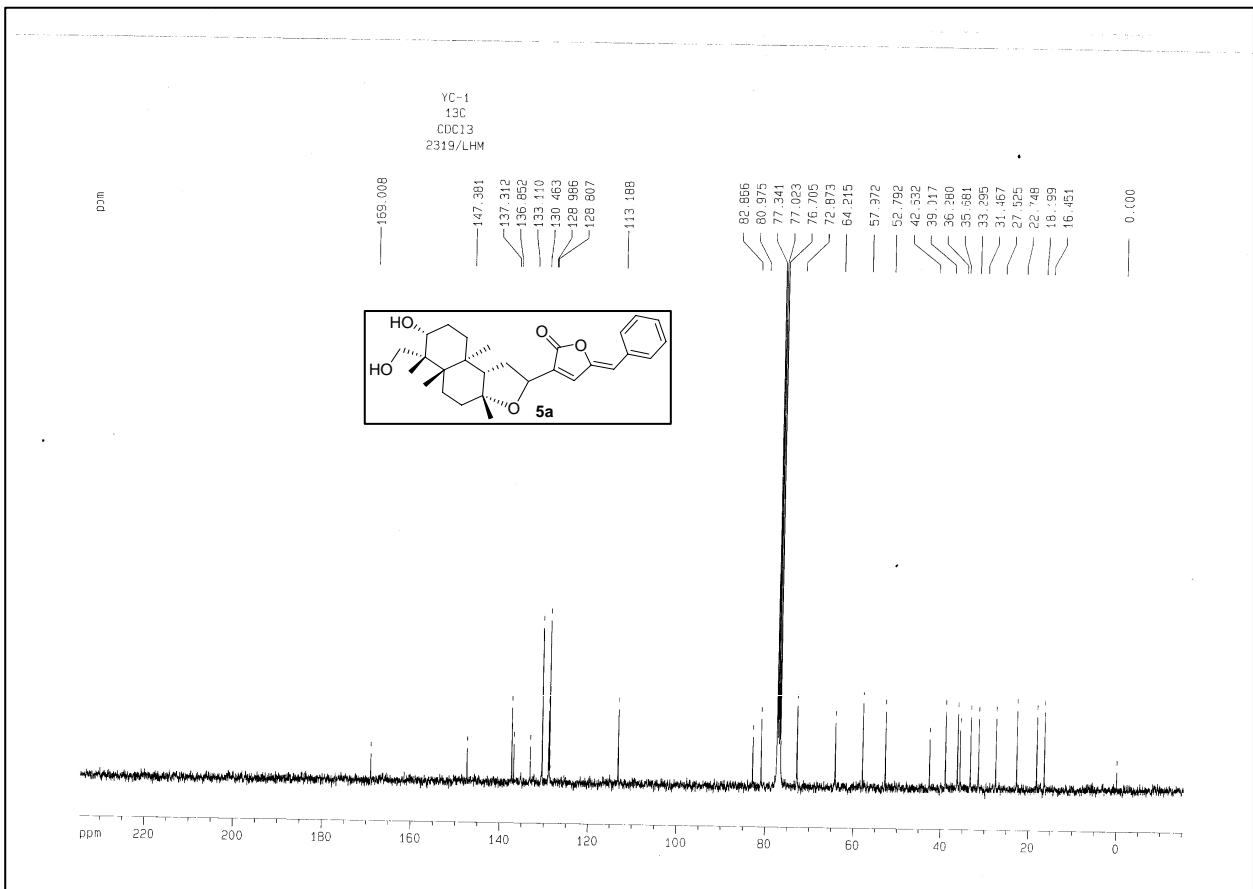

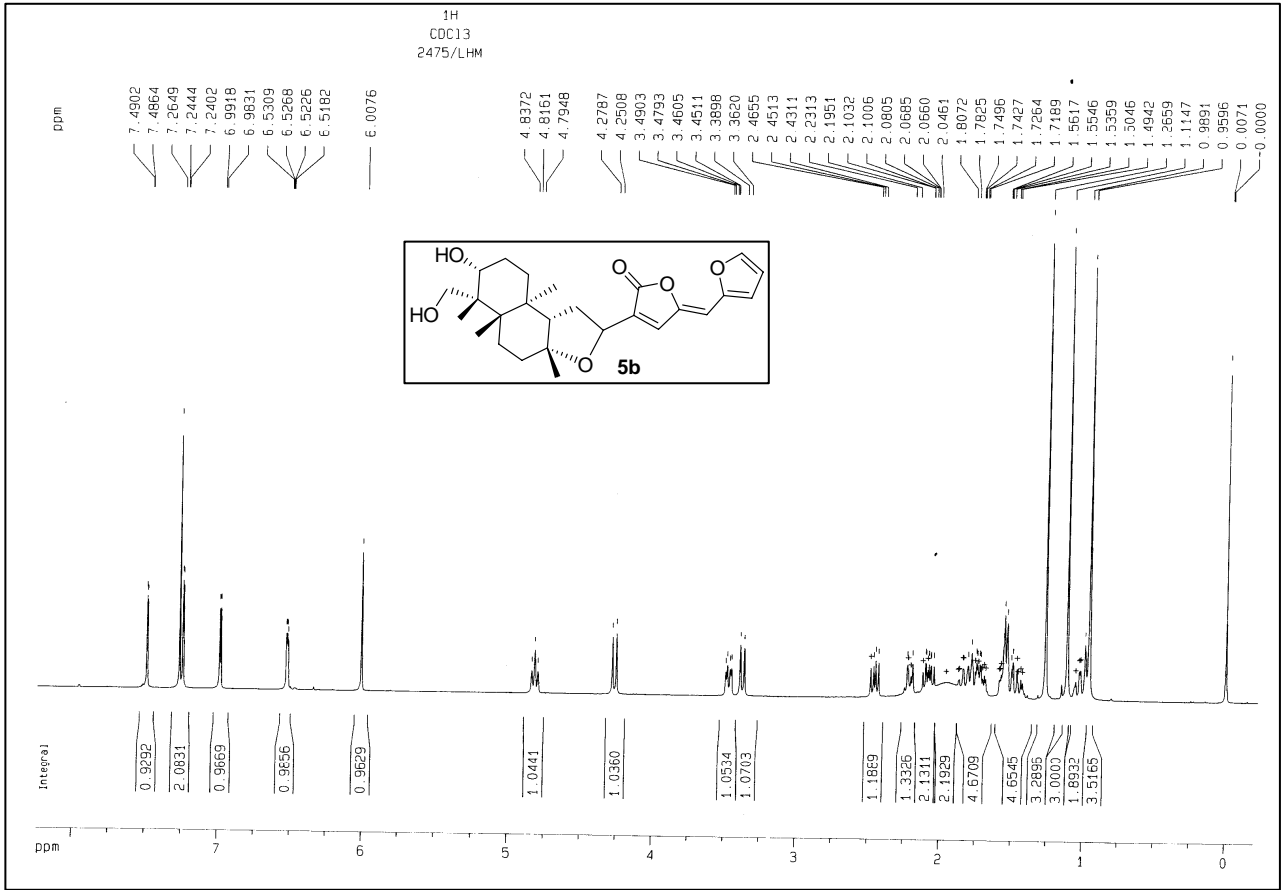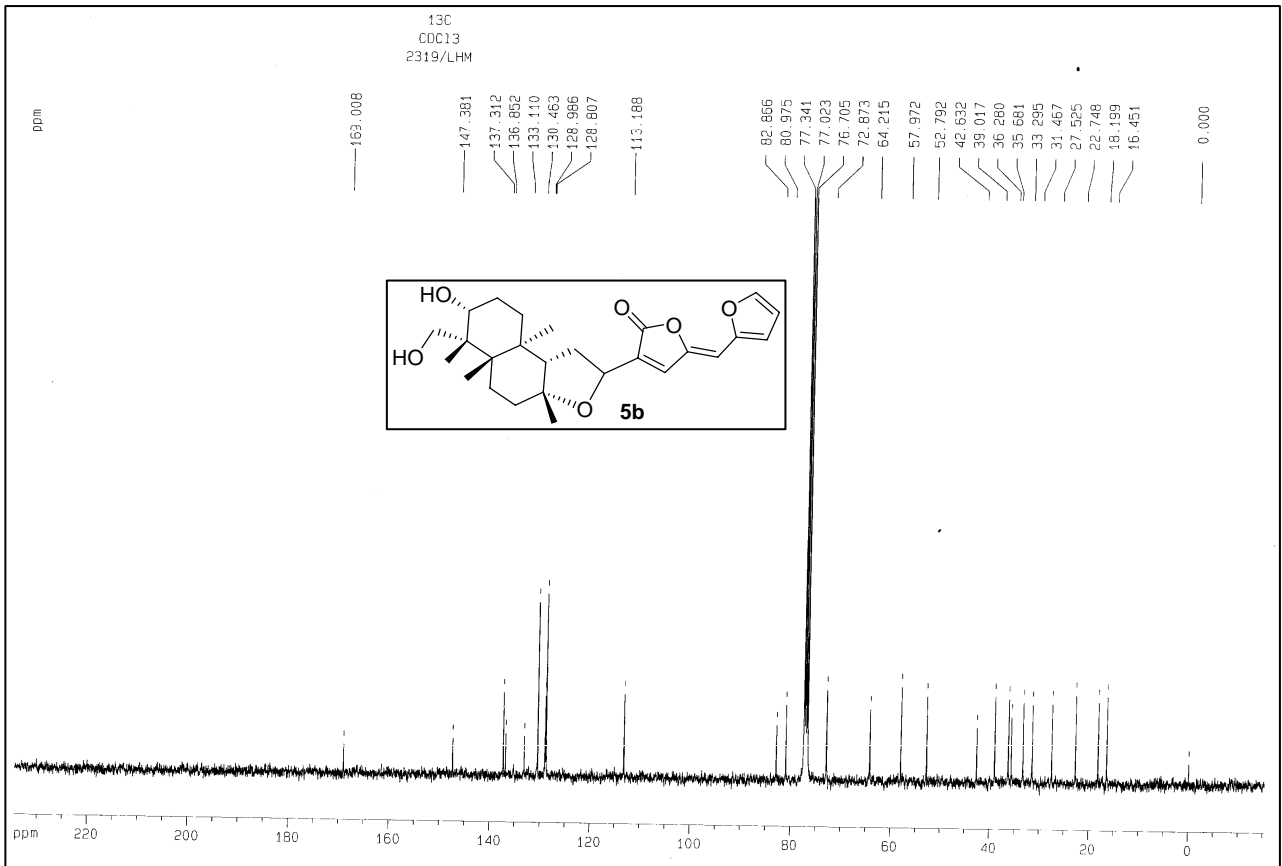

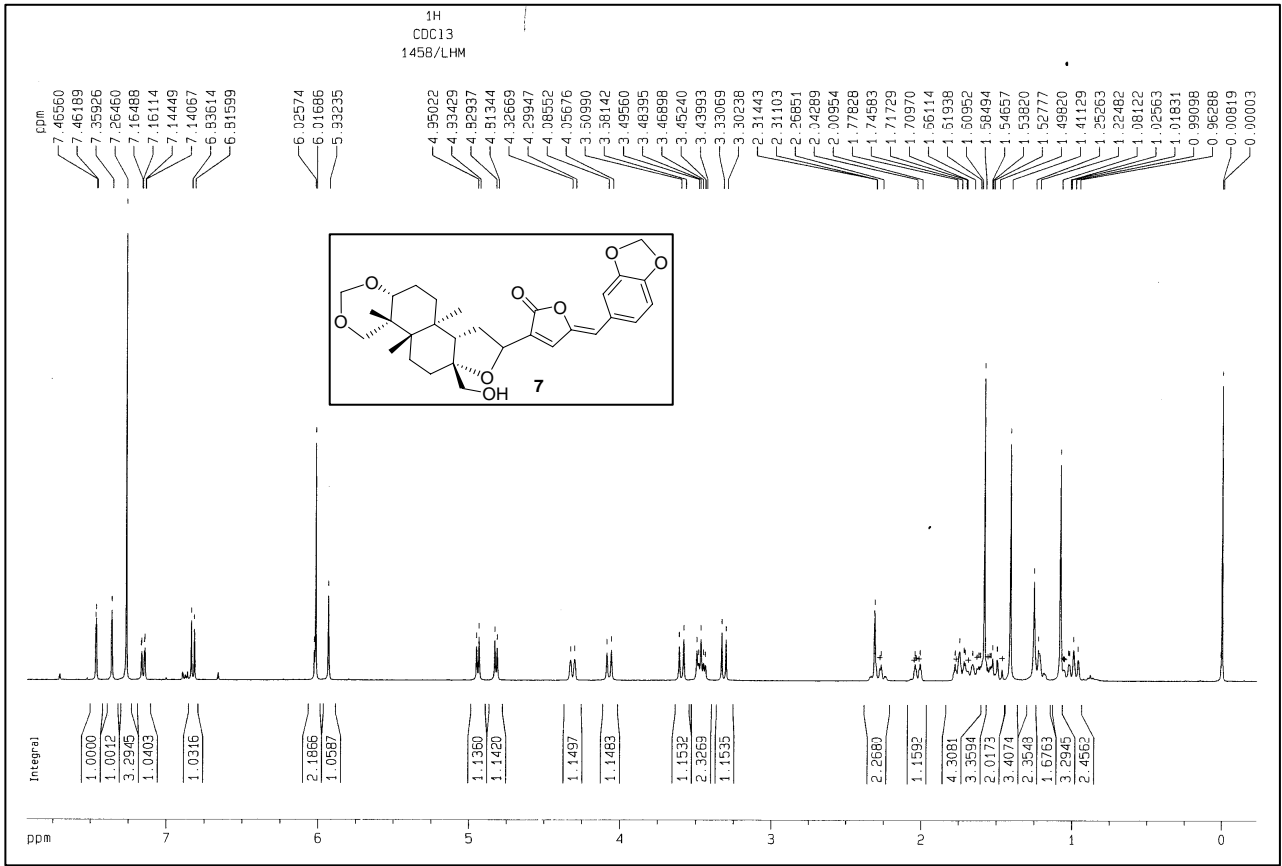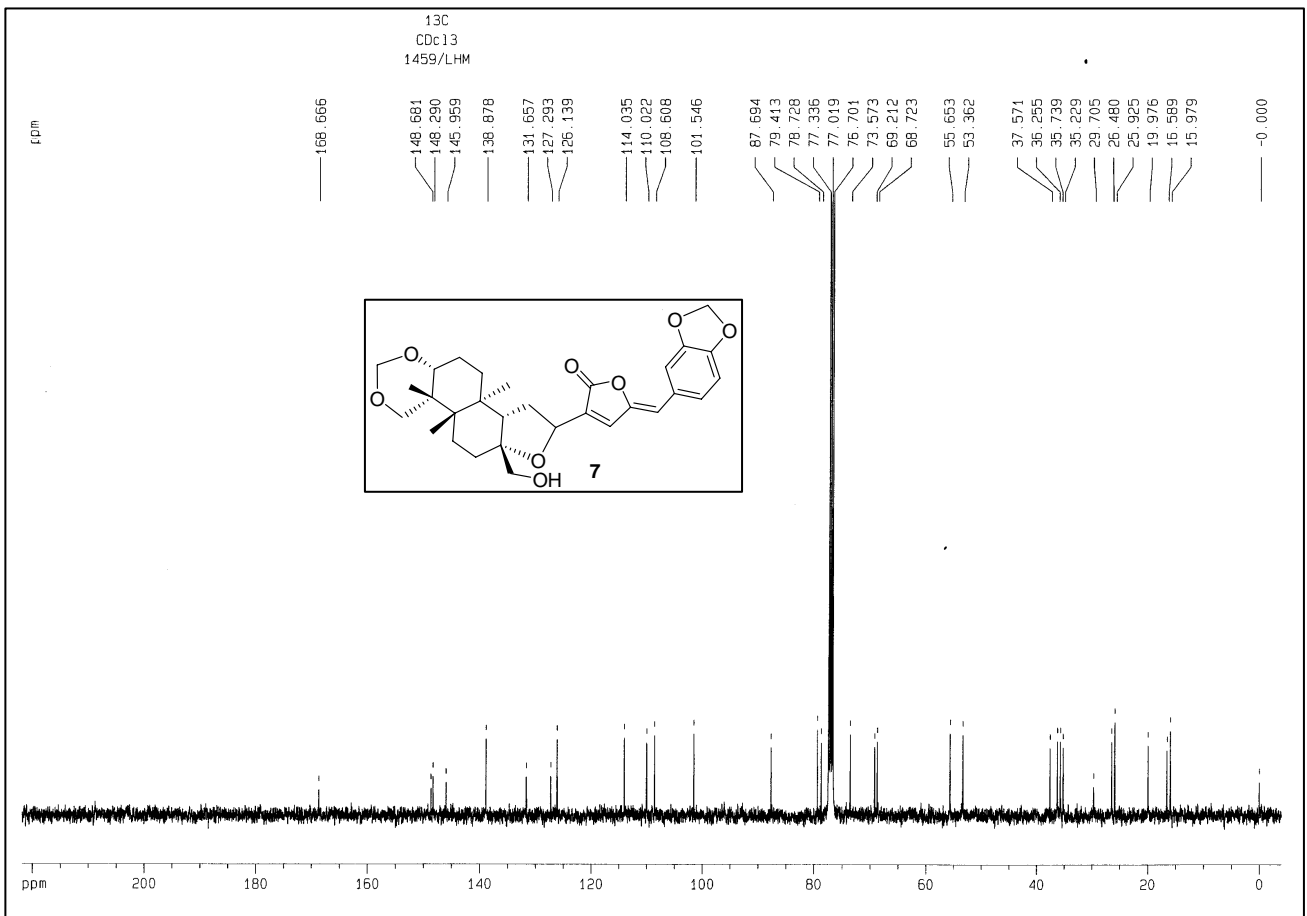

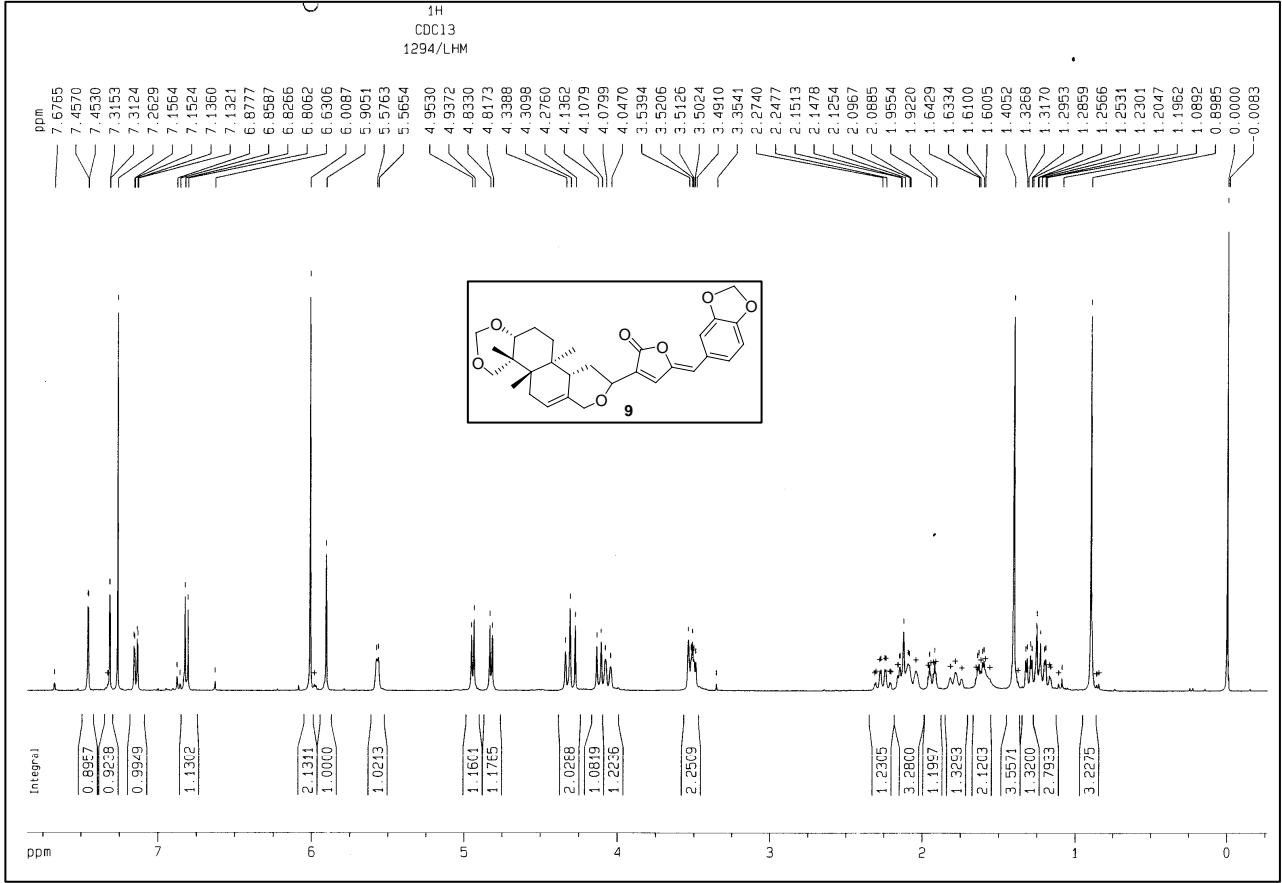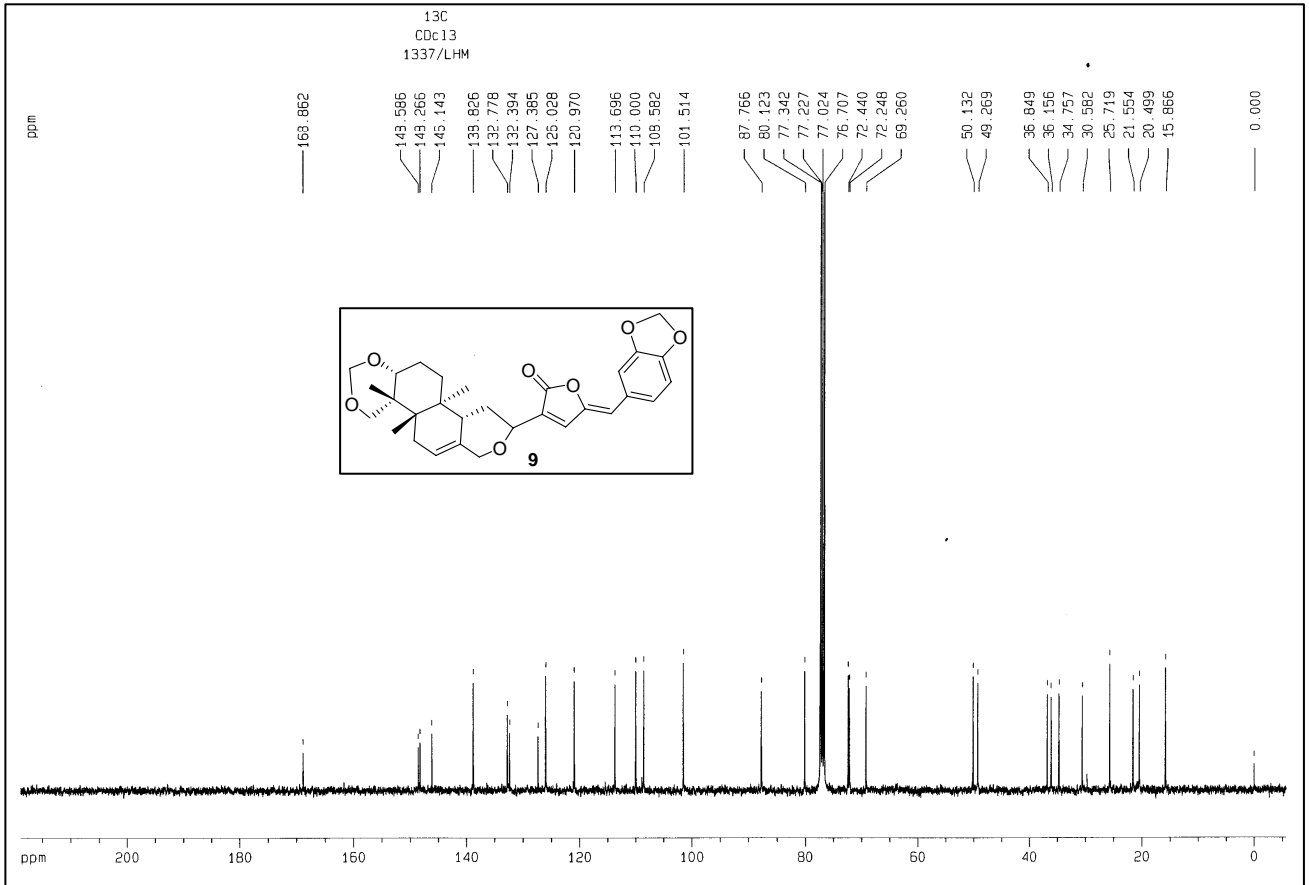

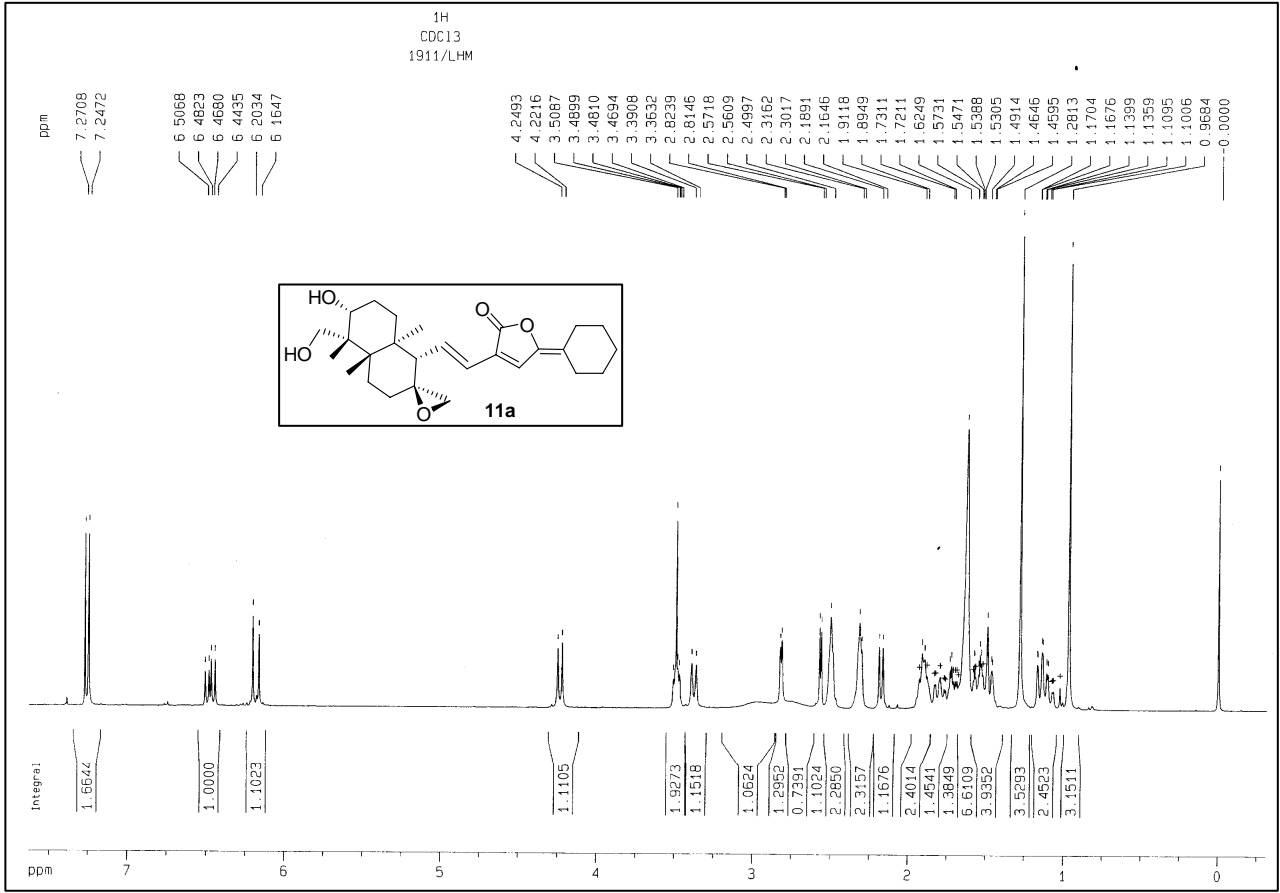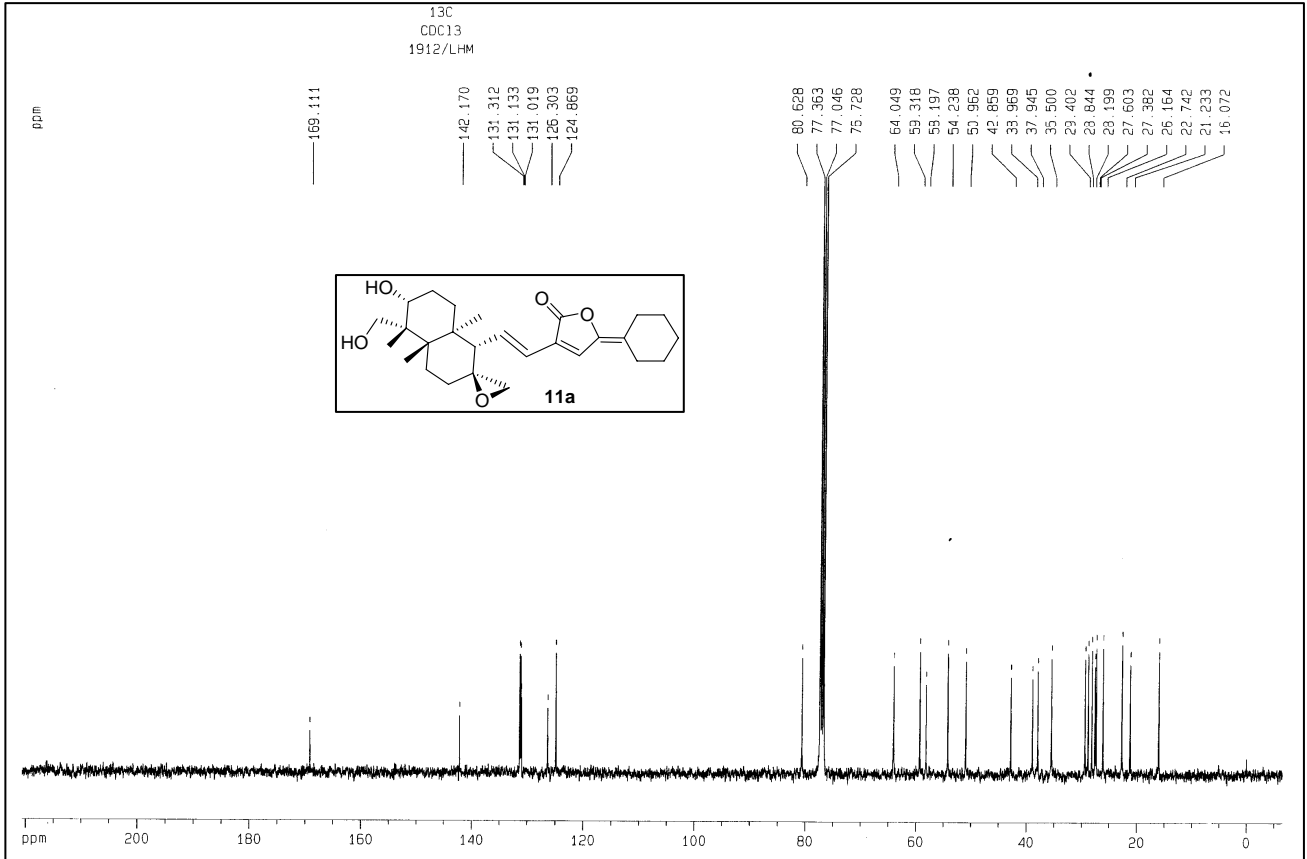

WF161

33.31919098

19-May-2006

LHM-355 53 (0.985) AM (Cen,4, 80.00, Ht,5000.0,0.00,1.00); Sm (Mn, 2x1.00); Cm (1:68)

TOF MS ES+

451.2457

1.92e3

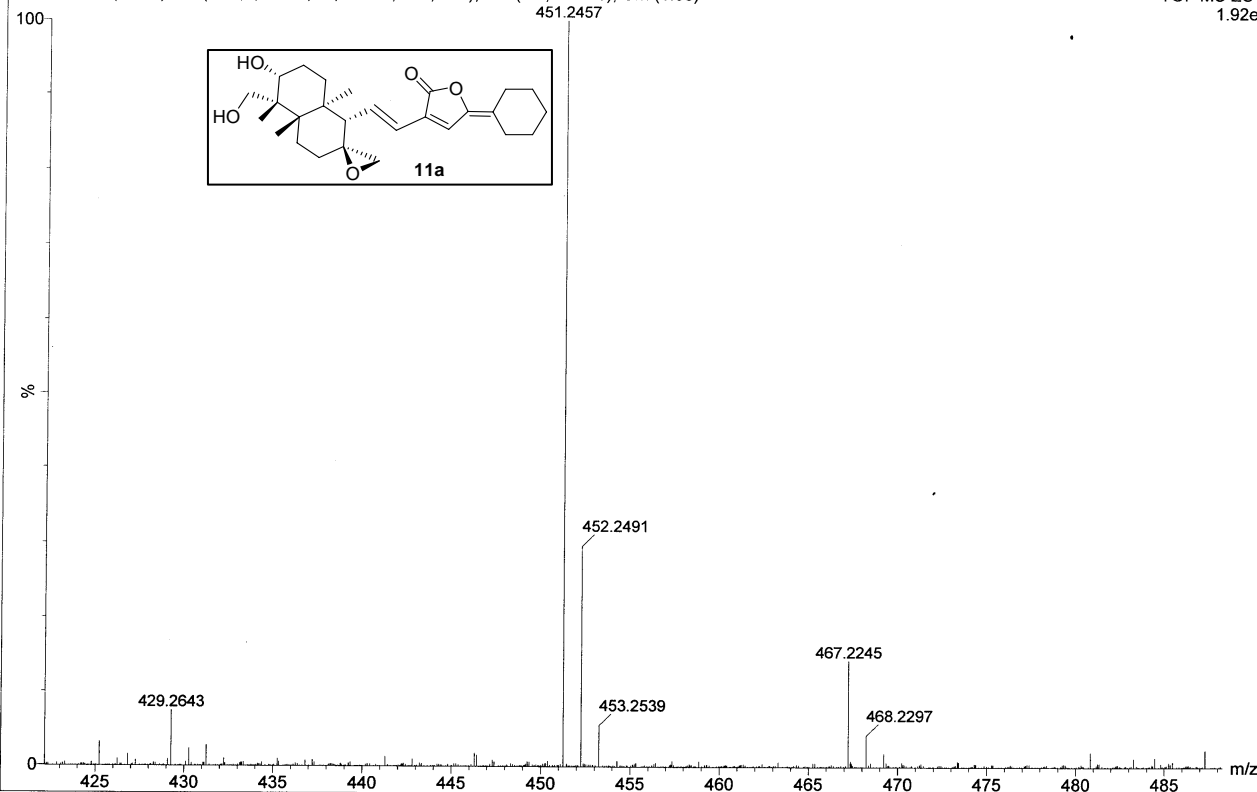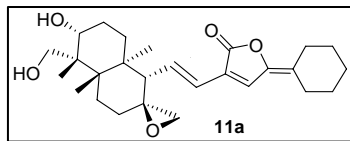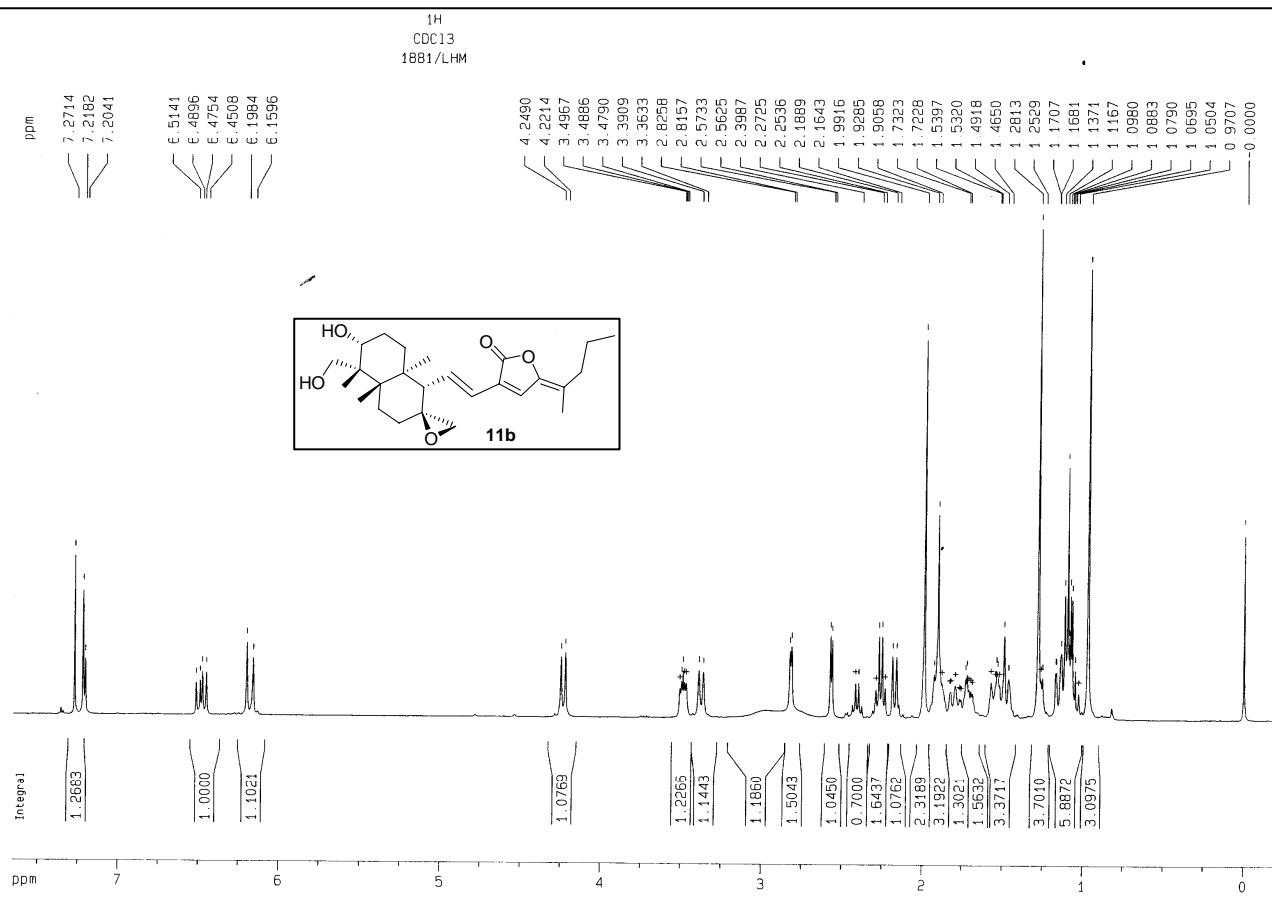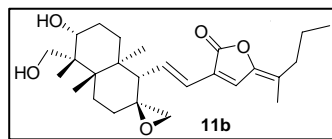

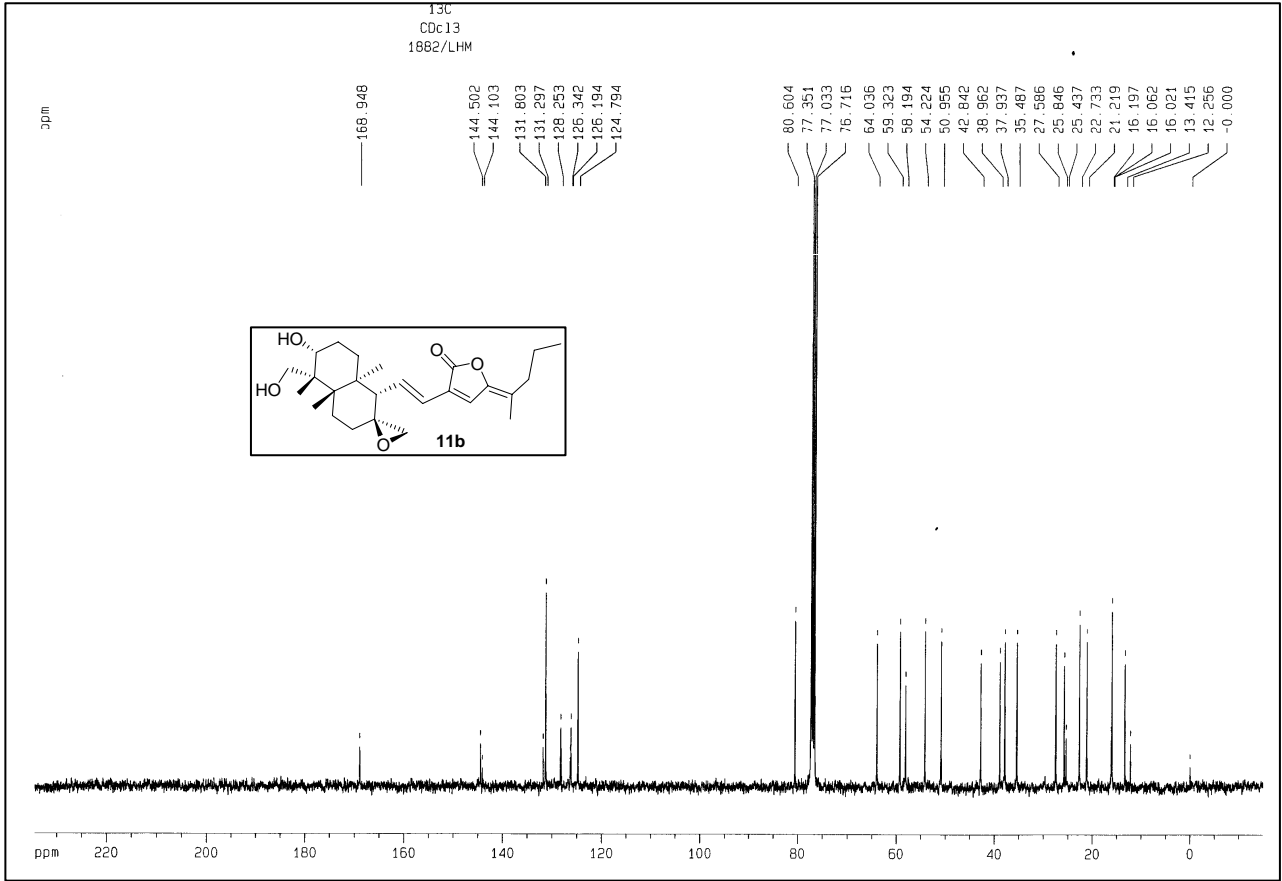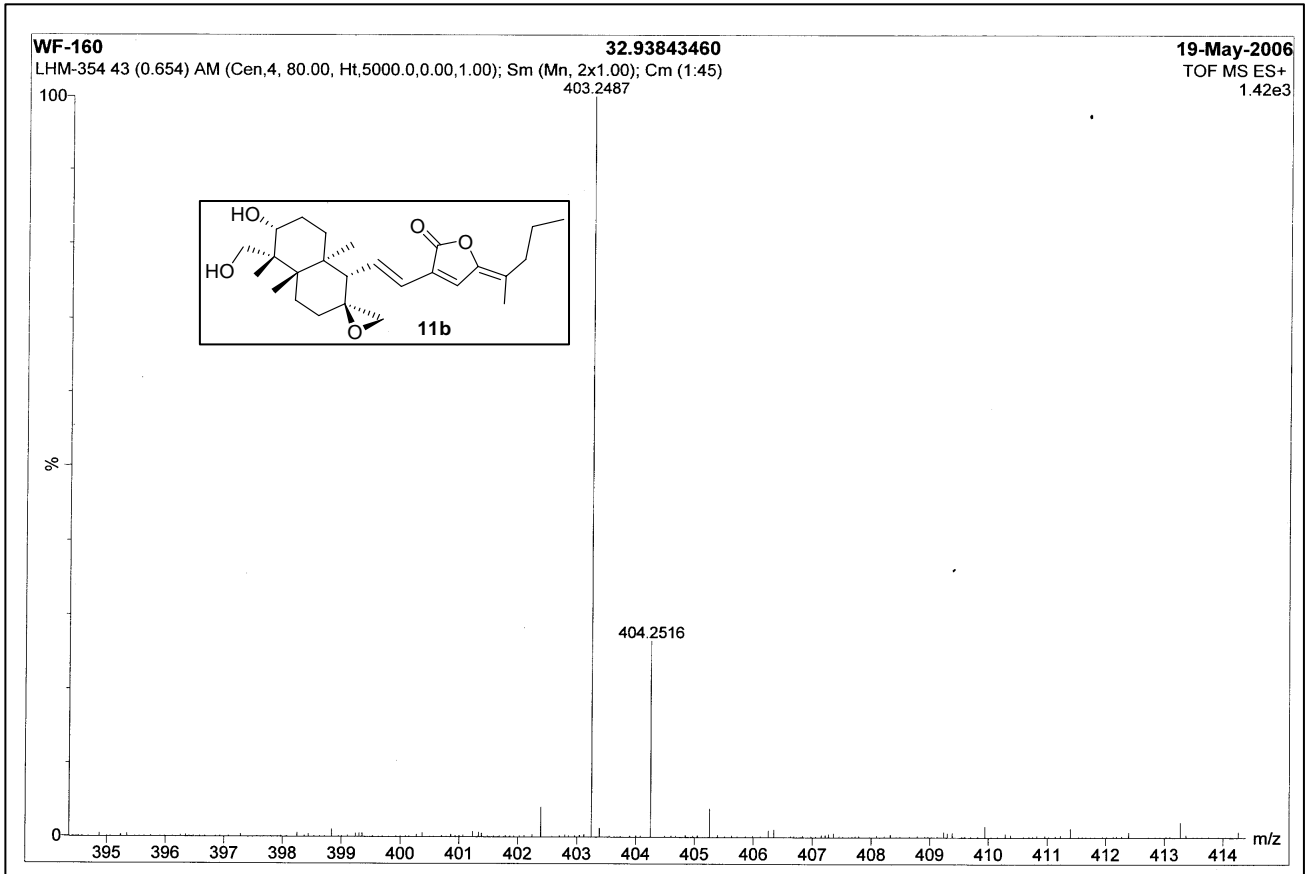



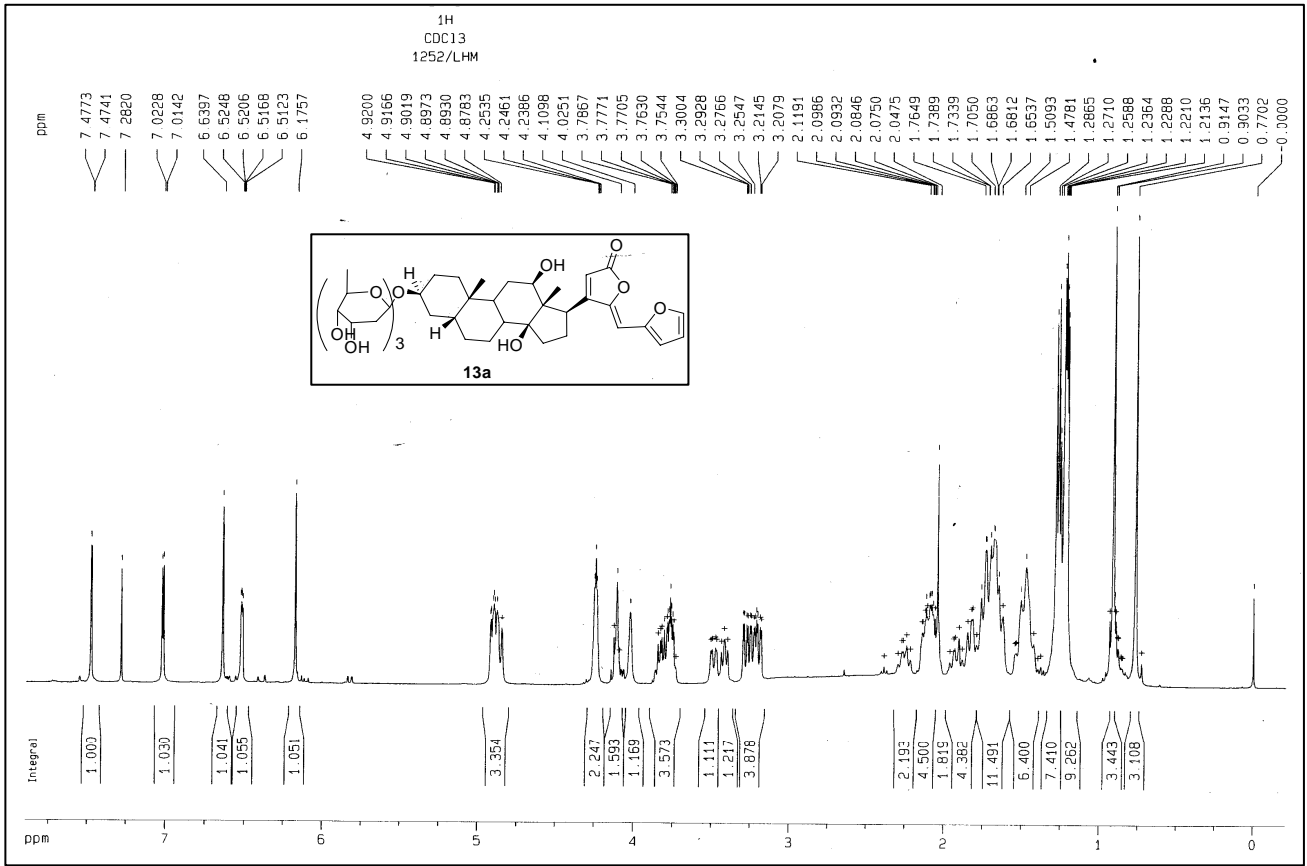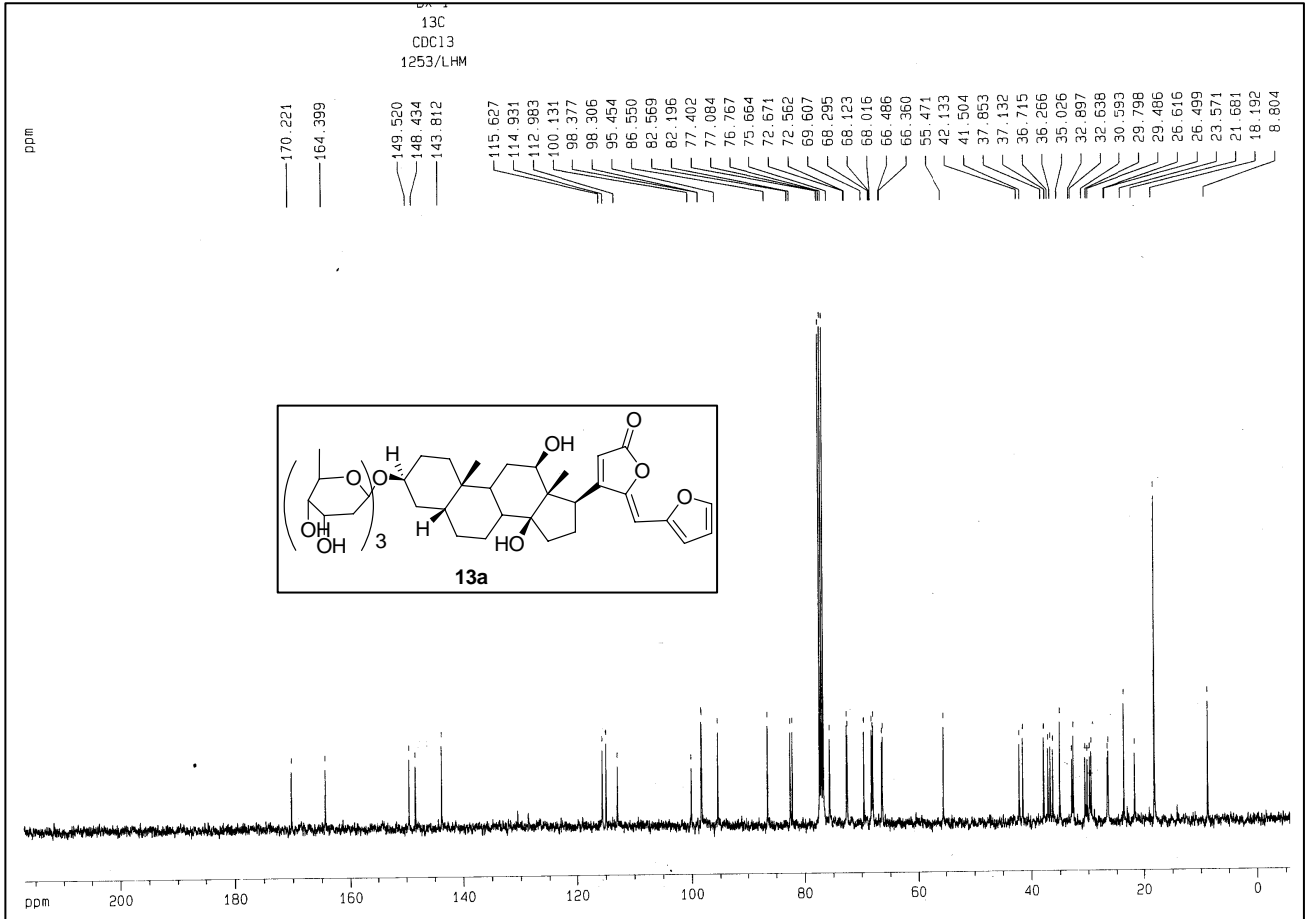

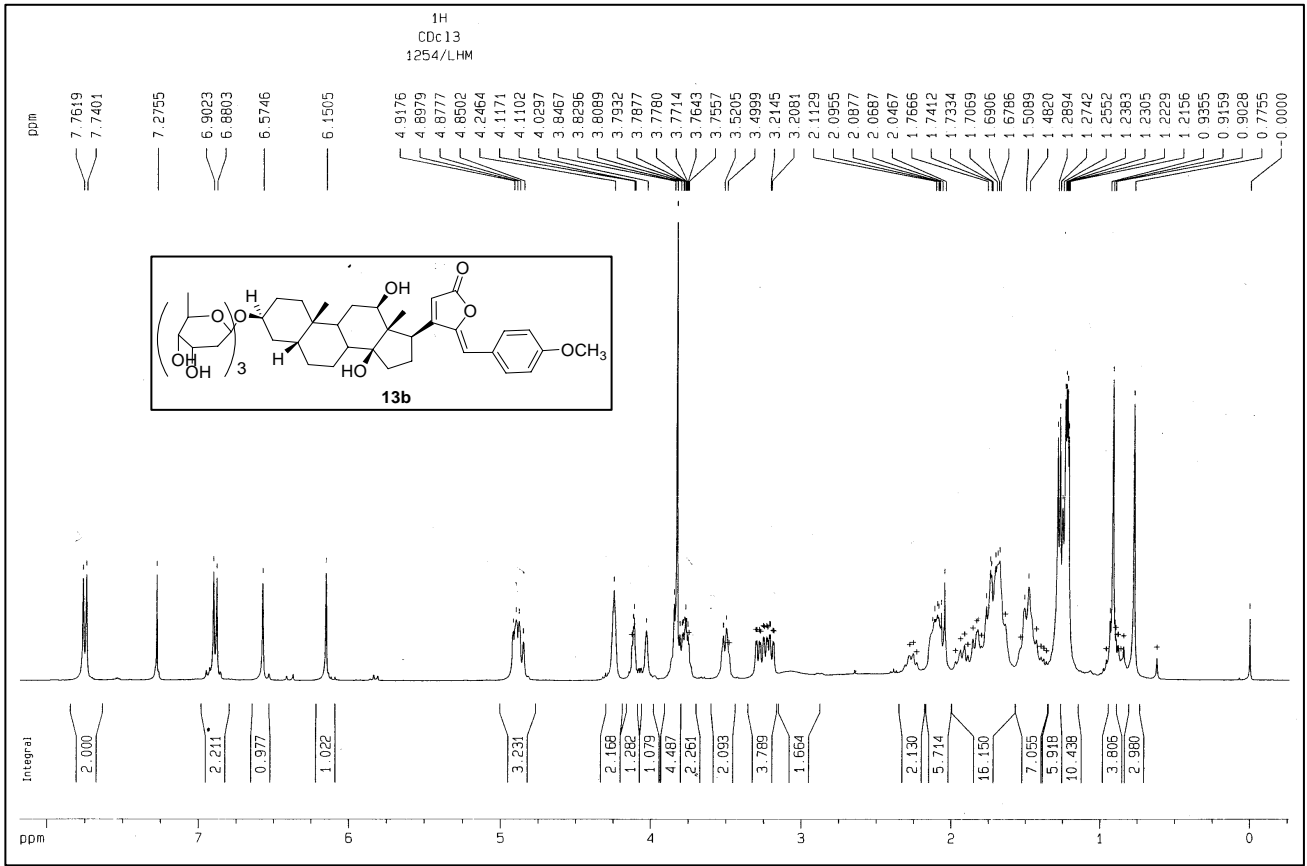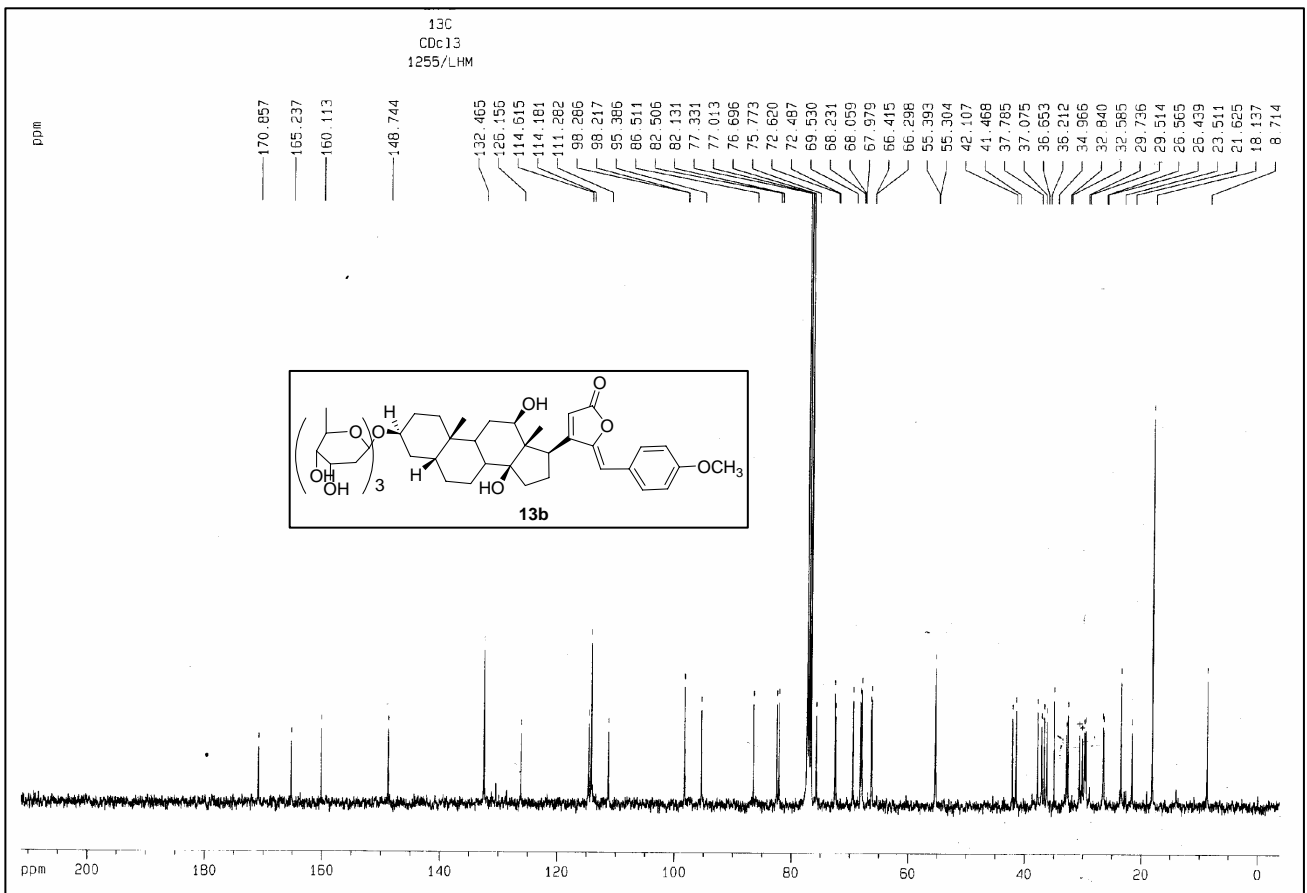

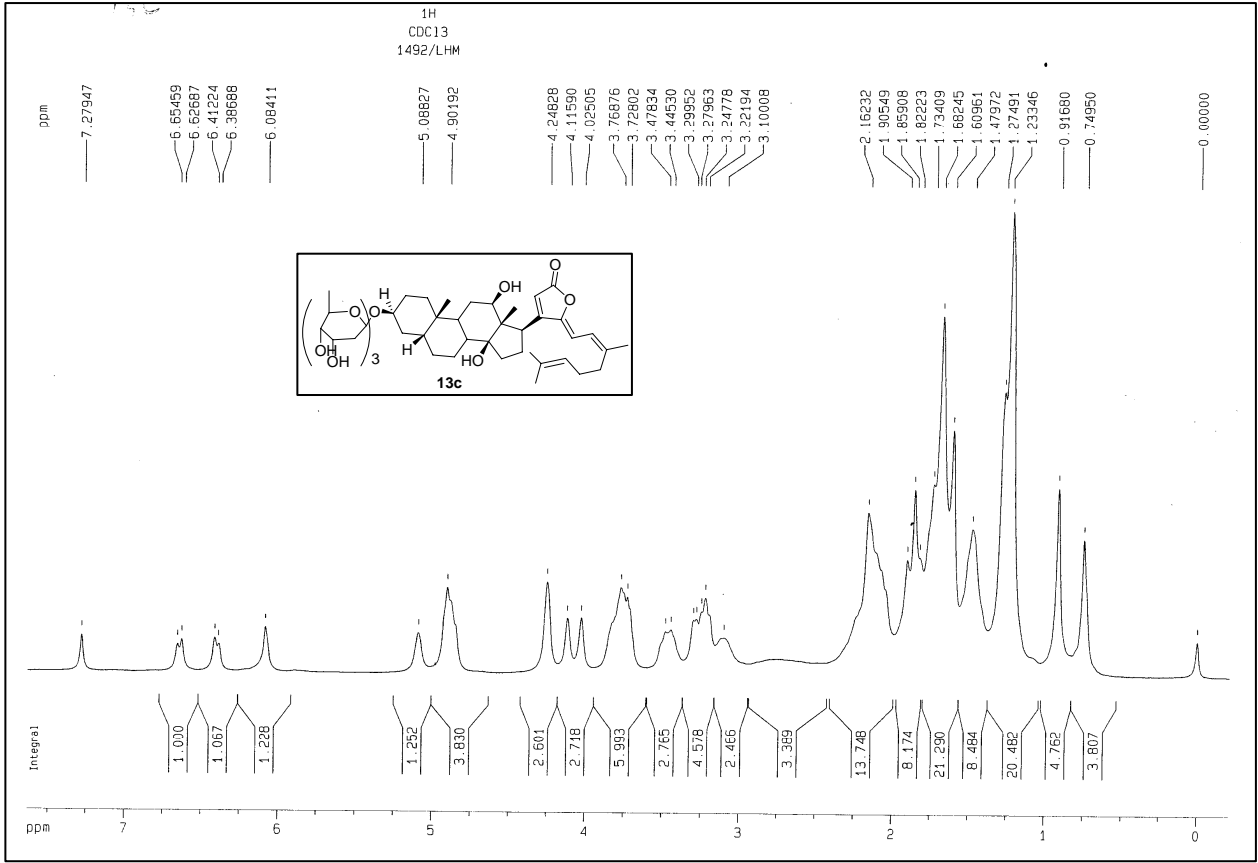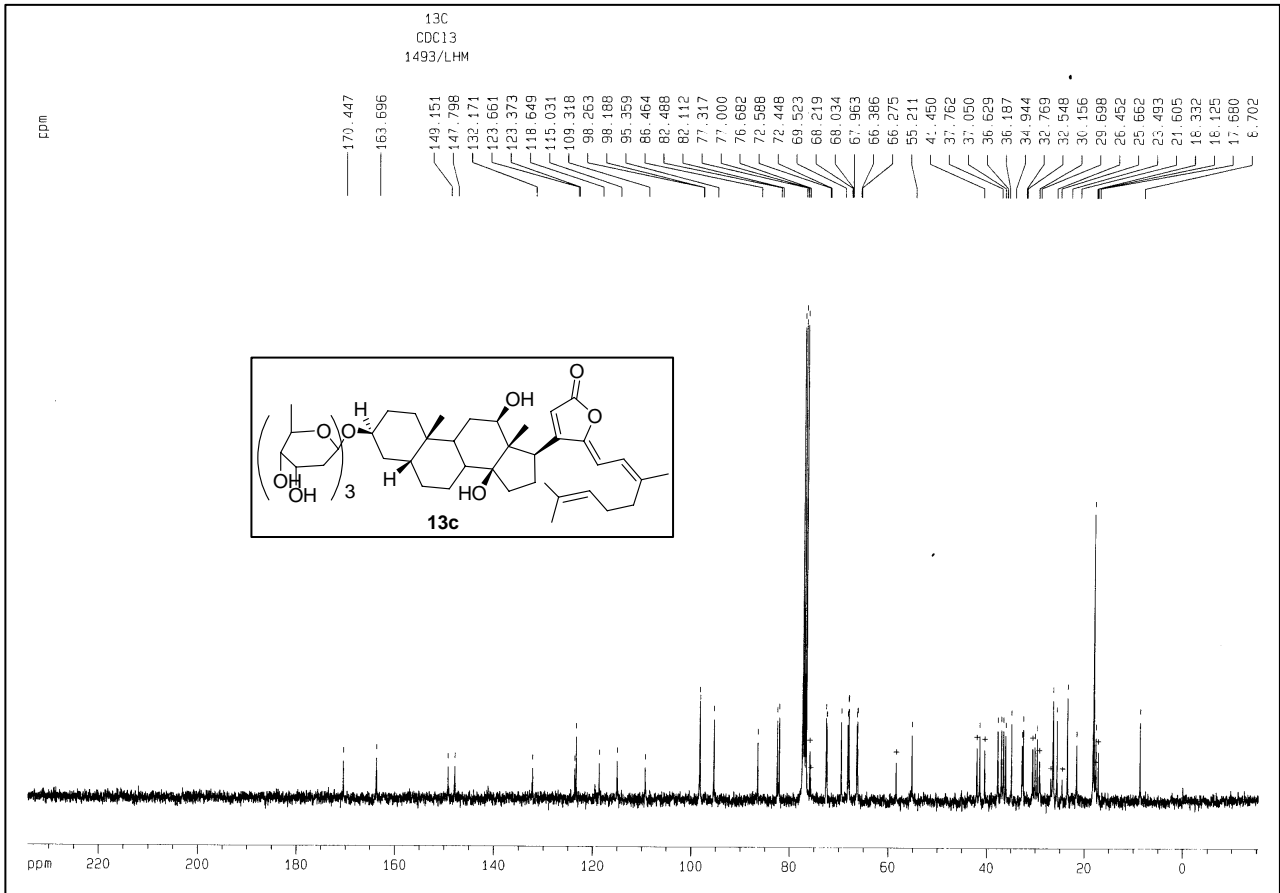

DX-11

28.88889503

25-Nov-2005

LHM-194 17 (0.315) AM (Cen,4, 80.00, Ht,5000.0,0.00,1.00); Sm (Mn, 1x2.00); Cm (2:97)

TOF MS ES+

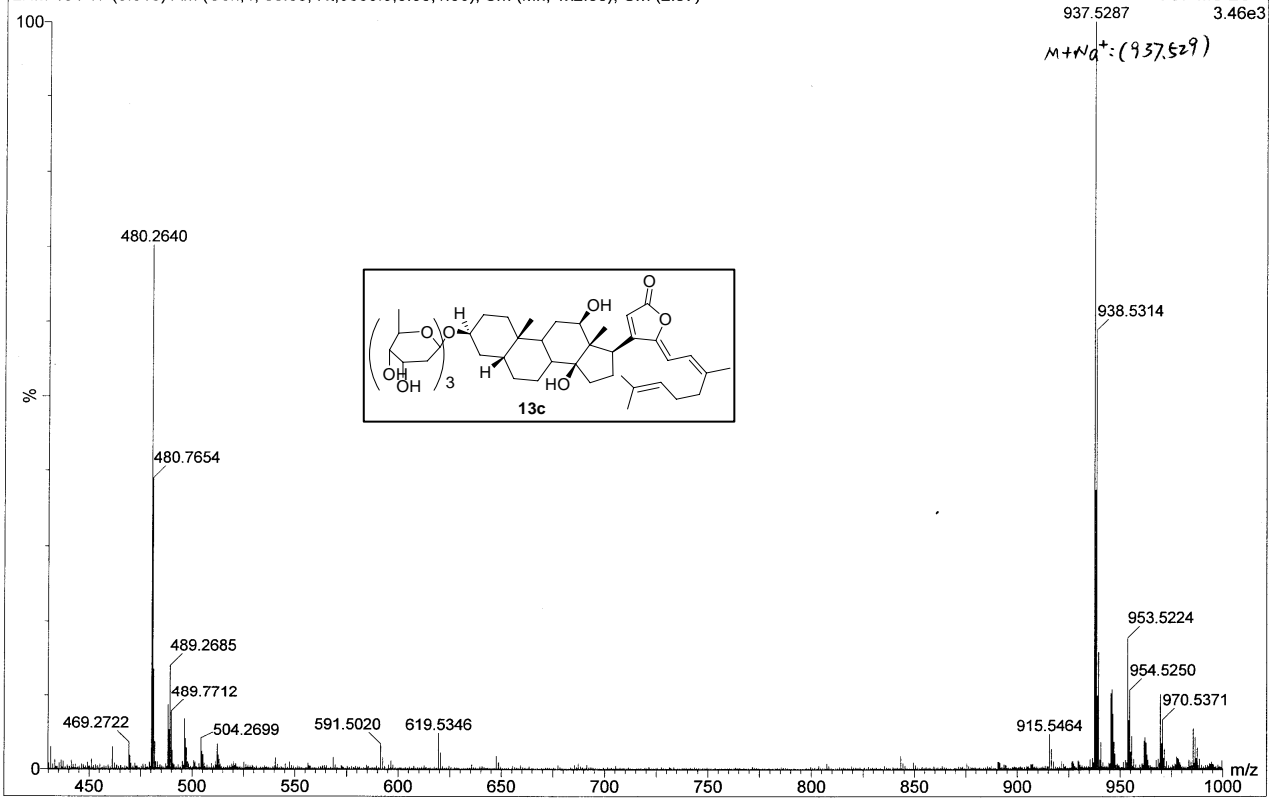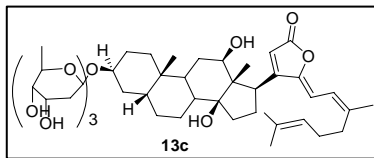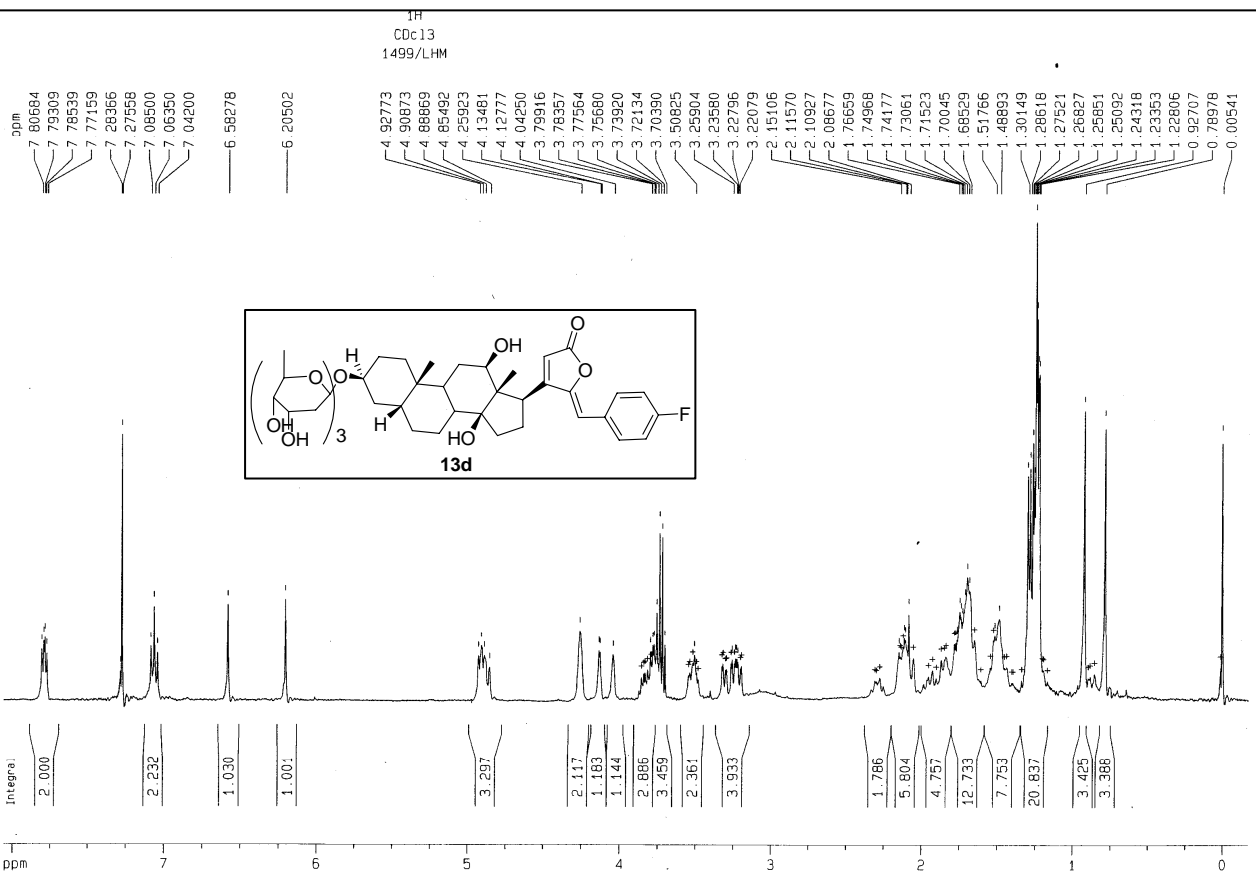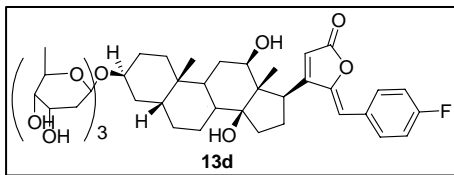

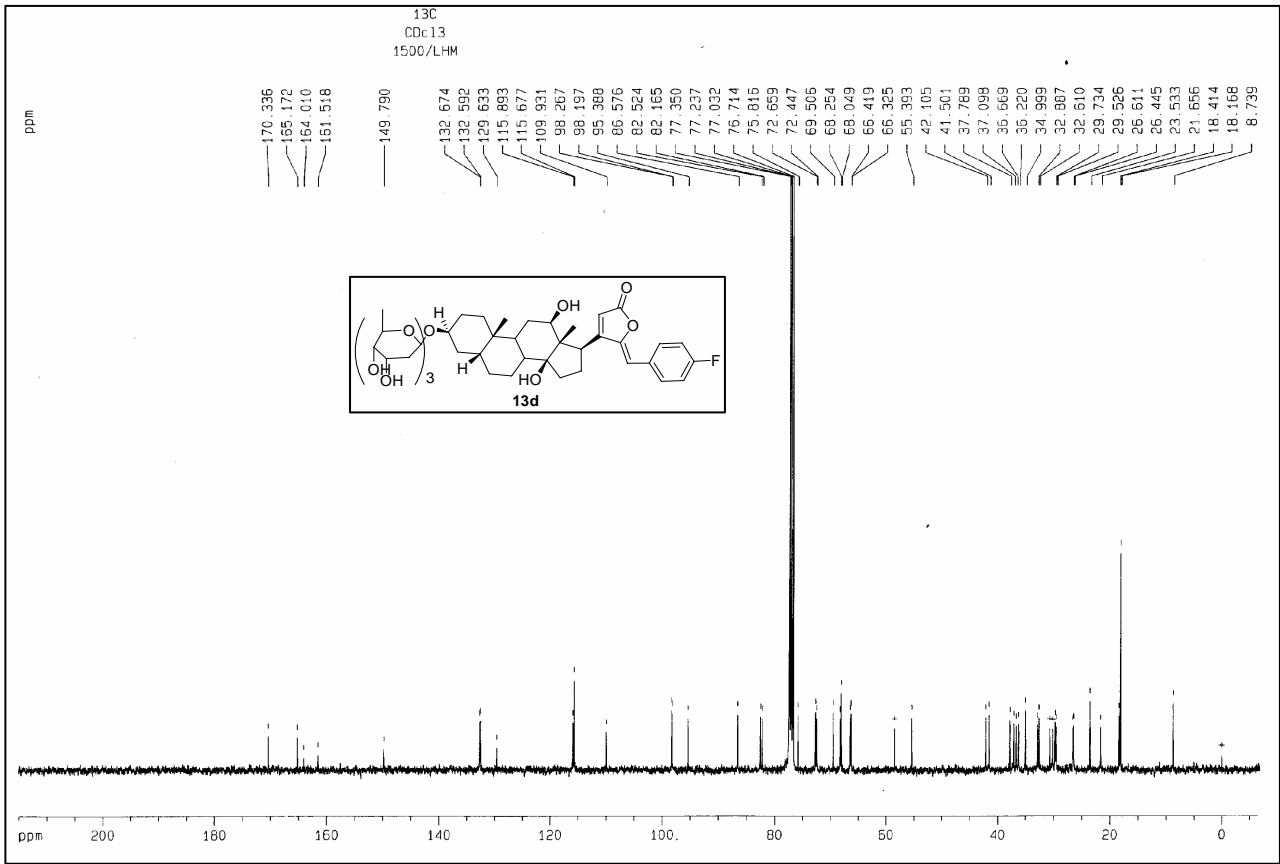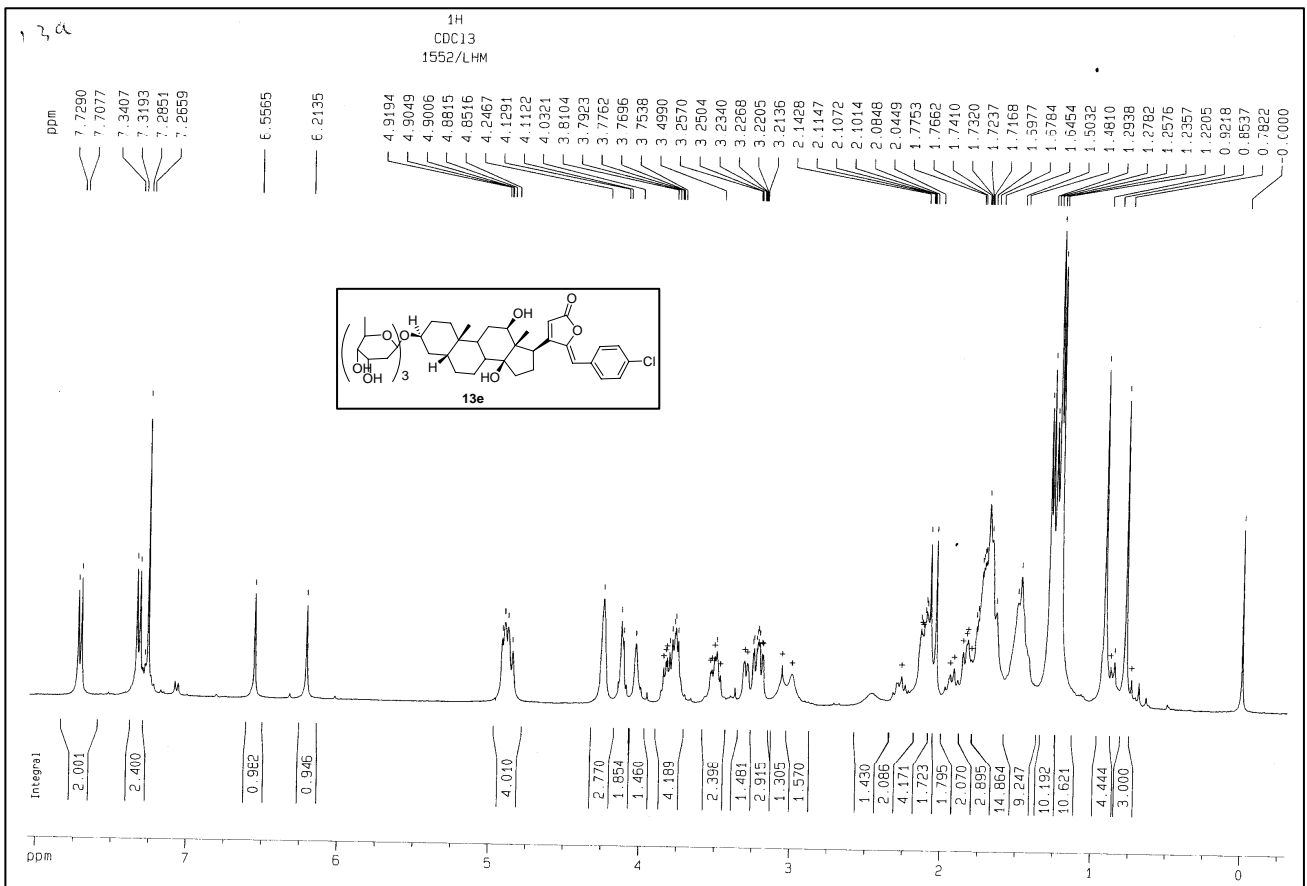

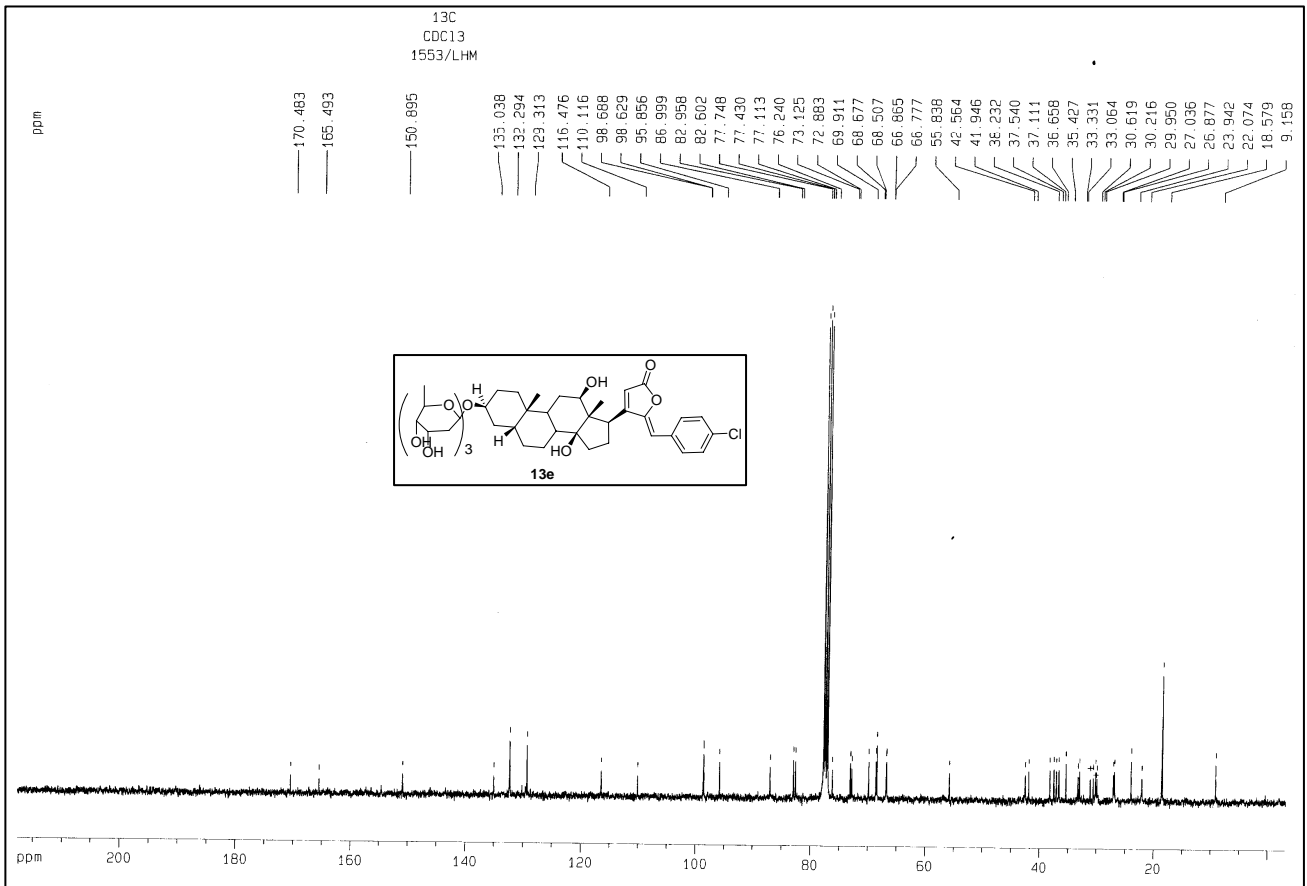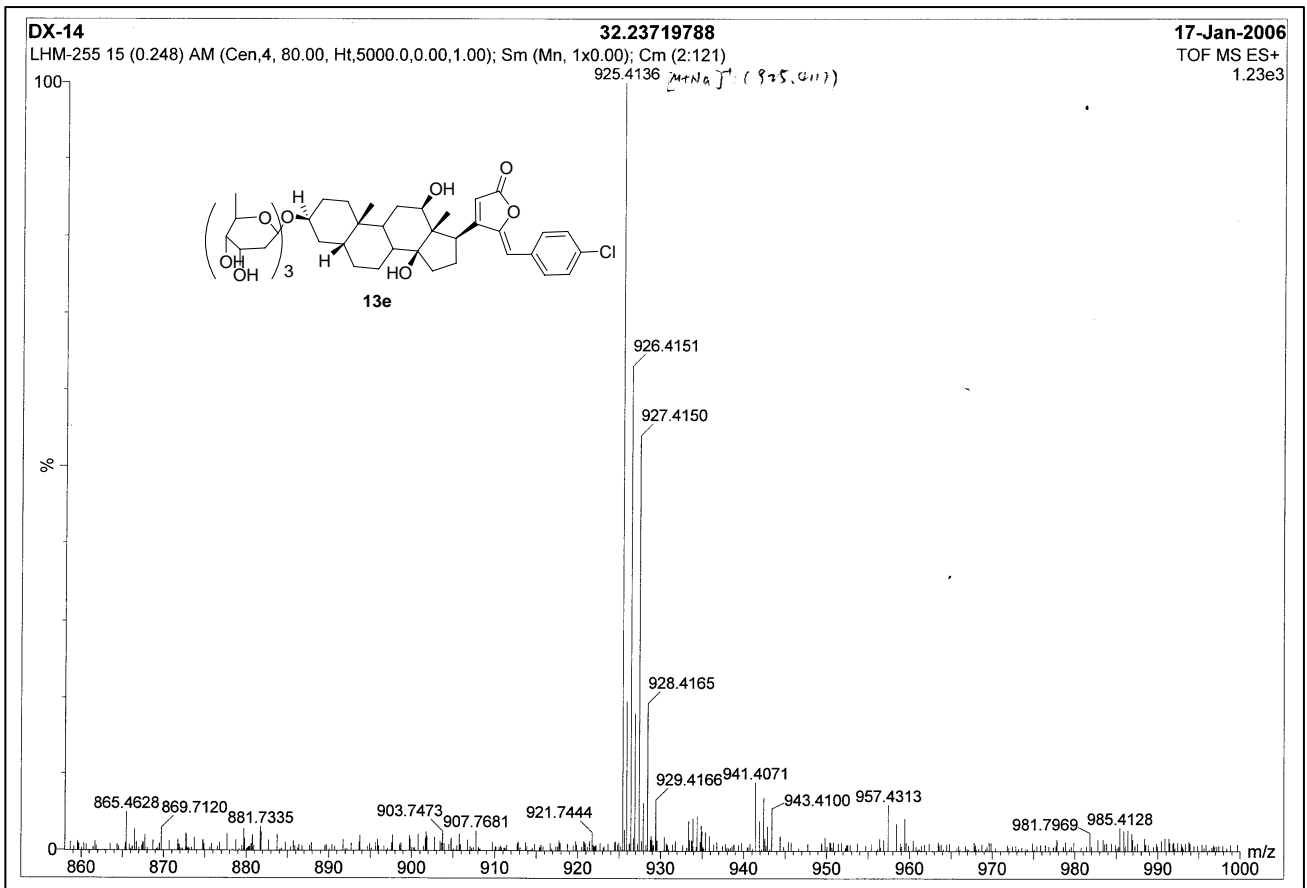

Supplement: b701051f-2.pdf [file b701051f-2.pdf]
